# Supplementary material for: Bridging Behavioral Gaps: Automatic Extrapolation of Concreteness Norms for Arabic and English with a k-Nearest Neighbor Approach
Source: Research Square preprint supplement (doi:10.21203/rs.3.rs-7858980/v1), 2025-11-02
Supplement: Supplementary file 1 [file arabic_dataset.xlsx]

## Sheet: Sheet1
Ar word	En word	Ar mean	Ar SD	En mean	En SD
إجهاض	abortion	3.44444	1.6881	3.41	1.39
قبول	acceptance	1.5	0.785905	2.21	1.26
حادثة	accident	4.05556	1.05564	3.26	1.48
إعجاب	admiration	2.05556	1.34917	1.86	1.06
تبني	adoption	2.38889	1.28973	3.03	1.45
طائرة	airplane	4.88889	0.323381	4.96	0.19
الكحول	alcohol	4.70588	0.685994	4.76	0.51
سفير	ambassador	4.22222	0.808452	4.28	1.1
تفاحة	apple	4.61111	1.14475	5	0
تقدير	appreciation	1.33333	0.594089	1.63	1
منطقة	area	3.33333	1.28338	3.72	1.28
إلحاد	atheism	1.38889	0.607685	2.23	1.36
ملحد	atheist	2.16667	1.24853	2.93	1.46
طفل	baby	4.55556	0.855585	5	0
كرة	ball	4.83333	0.707107	5	0
موز	banana	4.88889	0.323381	5	0
سلة	basket	4.83333	0.514496	5	0
لحية	beard	5	0	4.96	0.19
جمال	beauty	2.05556	1.30484	2.93	1.57
اعتقاد	belief	1.27778	0.574513	1.19	0.68
طائر	bird	4.88889	0.323381	5	0
نعمة	blessing	4.88889	0.323381	2.19	1.27
دم	blood	4.94444	0.235702	4.86	0.44
حد	boarder	2.06667	1.0328	3.52	1.47
زجاجة	bottle	4.83333	0.707107	4.91	0.44
ولد	boy	4.11111	0.963382	4.76	0.6
مخ	brain	4.27778	1.07406	4.69	0.74
شجاعة	bravery	1.66667	0.840168	1.96	1.02
صدر	breast	4.66667	1.02899	4.89	0.42
عروس	bride	4.38889	1.09216	4.63	0.74
مكنسة	broom	4.82353	0.727607	4.89	0.42
ميزانية	budget	2.55556	1.42343	3.14	1.41
مبنى	building	4.77778	0.427793	4.64	0.91
بيروقراطية	bureaucracy	1.82353	1.38	1.64	1.11
فراشة	butterfly	4.94444	0.235702	4.93	0.26
سيارة	car	4.88889	0.471405	4.89	0.31
قطة	cat	4.88889	0.471405	4.86	0.52
مقبرة	cemetery	4.5	0.857493	4.93	0.26
رقابة	censorship	2.11111	1.07861	1.79	1.11
احتفال	ceremony	3	1.23669	3.57	0.96
ولادة	childbirth	4.16667	1.15045	4.04	1.24
طفولة	childhood	2.38889	1.14475	2.53	1.36
كنيسة	church	4.55556	0.783823	4.9	0.41
ختان	circumcision	3.47059	1.69991	4.13	1.17
حضارة	civilization	1.83333	0.923548	3.32	1.52
مناخ	climate	3	1.49509	3.5	1.48
قهوة	coffee	4.94444	0.235702	4.81	0.79
مجتمع	community	2.05556	0.937595	3.52	1.37
كمبيوتر	computer	4.94444	0.235702	4.93	0.26
مفهوم	concept	1.55556	1.14903	1.41	0.64
مؤامرة	conspiracy	1.72222	0.826442	1.76	1.16
جثة	corpse	4.61111	0.978528	4.89	0.42
فساد	corruption	1.72222	0.826442	2.39	1.45
دولة	country	3.27778	1.36363	4.17	1.18
ثقافة	culture	1.44444	0.704792	2.04	1.34
كوب	cup	4.94444	0.235702	5	0
ابنة	daughter	4.16667	0.785905	4.79	0.5
يوم	day	2.38889	1.33456	3.92	1.38
ديمقراطية	democracy	1.72222	0.95828	1.78	1.01
صحراء	Desert	4.55556	0.921777
قدر	Destiny	1.27778	0.574513	1.67	0.92
شيطان	devil	2.55556	1.54243	3.41	1.57
طبيبة	Doctor (Female)	4.44444	1.04162	4.69	0.81
طبيب	doctor (male)	4.61111	0.777544	4.69	0.81
كلب	dog	4.94444	0.235702	4.85	0.46
عقيدة	dogma	1.38889	0.607685	1.79	1.03
حمار	donkey	4.94444	0.235702	5	0
سائق	driver (male)	4.5	0.707107	4.71	0.66
نسر	eagle	4.72222	0.95828	5	0
تعليم	education	2.38889	1.24328	2.93	1.34
سفارة	embassy	4.11111	1.32349	3.96	1.4
موظفة	employee (female)	4.5	0.857493	4.1	1.21
موظف	employee (male)	4.44444	0.704792	4.1	1.21
تشجيع	encouragement	2.11111	1.2314	1.96	1.4
عين	eye	4.77778	0.646762	4.9	0.41
إيمان	faith	2.05556	1.47418	1.63	1.08
عائلة	family	3.83333	1.09813	4.23	0.86
مجاعة	famine	3.16667	1.54349	3.55	1.4
فلاح	farmer (male)	4.55556	0.783823	4.54	0.95
أب	father	4.11111	1.02262	4.52	1.02
جنين	fetus	4.55556	0.783823	4.62	0.92
إصبع	finger	4.77778	0.548319	5	0
غابة	forest	4.5	0.923548	4.76	0.64
مغفرة	forgiveness	1.88889	1.27827	1.44	0.89
حرية	freedom	1.72222	1.07406	2.34	1.4
صداقة	friendship	1.66667	0.970143	2.39	1.29
أثاث	furniture	4.72222	0.574513	4.89	0.31
كرم	generosity	1.77778	1.16597	1.84	1.22
هدية	gift	3.94444	1.16175	4.56	0.64
بنت	girl	4.55556	0.704792	4.85	0.46
قفاز	glove	4.61111	1.14475	4.97	0.18
الله	God	2.66667	1.71499
خير	goodness	1.72222	1.17851	1.38	0.73
حكومة	government	3.38889	1.37793	2.88	1.39
شعر	hair	4.27778	1.44733	4.97	0.19
مصافحة	handshake	4.33333	1.08465	4.52	0.75
شماعة	hanger	4.57143	0.851631	4.81	0.48
سعادة	happiness	2.05556	1.30484	2.6	1.26
قبعة	hat	4.94444	0.235702	4.88	0.6
جنة	heaven	2.72222	1.52646	1.81	1.47
جهنم	hell	2.27778	1.60167
مساعد	helper (male)	3.11765	1.45269	3.39	1.42
قداسة	holiness	1.41176	1.00367	1.56	1.12
وطن	homeland	2.05556	0.998365	3.45	1.48
صدق	honesty	1.72222	0.751904	1.59	1.02
شرف	Honor	1.27778	0.574513	2.15	1.26
ضيافة	hospitality	2.16667	1.04319	2.15	1.26		NN			326144
فندق	hotel	4.55556	0.783823	4.93	0.38
إنسانية	humanity	1.66667	0.907485	2.36	1.38
إذلال	humiliation	2	1.21106	1.96	1.14
زوج	husband	4	0.970143	4.11	1.22
فكرة	idea	1.38889	0.697802	1.61	1.2
مثالية	idealism	1.38889	0.697802	1.64	1.06
مرض	illness	2.94444	1.34917	3.54	1.29
خلود	immortality	1.55556	1.09664	1.52	0.87
نجاسة	impurity	2.58824	1.69775	1.93	1.08
عدوى	infection	3.05556	1.58938	4.1	1.11
تضخم	inflation	2.64706	1.41161	2.54	1.5
معلومة	information	2.11111	1.02262	2.87	1.41
نيّة	intention	1.88889	1.40958	1.7	0.79
جماع	intercourse	3.88235	1.36393	3.93	1.46
تعصب	intolerance	1.66667	0.766965	2	1.14
غزو	invasion	2.44444	1.42343	3.65	1.07
غيرة	jealousy	1.61111	0.978528	1.8	1.12
عدالة	justice	1.5	0.785905	1.45	0.74
مصباح	lamp	4.38889	1.28973	4.97	0.19
غسيل	laundry	4.44444	0.855585	4.93	0.26
مكتبة	library	4.66667	0.766965	4.8	0.76
حياة	life	2.16667	0.985184	4.59	0.87
برق	lightning	4.66667	0.594089	4.59	0.87
حبيب	lover (male)	3.38889	1.28973	3.68	1.42
وفاء	loyalty	1.44444	0.704792	1.57	0.88
حظ	luck	1.5	0.618347	1.33	0.71
رجل	man	4.55556	0.855585	4.79	0.5
مدير	manager (male)	4.33333	0.766965	4.14	1.11
زواج	marriage	3.33333	1.28338	2.51	1.2
إعلام	media	2.44444	1.46417	3.57	1.19
دواء	medicine	4.61111	0.849837	4.79	0.5
عقل	mind	3.05556	1.43372
تواضع	modesty	1.5	0.857493	2.23	1.33
مال	money	4.83333	0.514496	4.54	0.84
أخلاق	morality	1.55556	1.04162	1.47	0.97
مسجد	mosque	4.72222	0.669113	4.54	0.92
أم	mother	4.44444	0.704792	4.6	0.72
جبل	mountain	4.77778	0.427793	4.96	0.2
جارة	neighbor (female)	4	0.970143	4.64	0.62
جار	neighbor (male)	3.88889	1.13183	4.64	0.62
أخبار	news	3	1.36931	3.41	1.52
صحيفة	newspaper	4.55556	1.14903	4.82	0.55
عري	nudity	3.33333	1.57181	4.13	1.2
طاعة	obedience	1.61111	1.0369	2.29	1.46
مكتب	office	5	0	4.93	0.27
ألم	pain	3.33333	1.6088	3.5	1.58
مفارقة	paradox	1.58824	0.712287	1.54	1.07
الناس	people	4.16667	0.923548	4.82	0.48
حج	pilgrimage	3.17647	1.23669	2.15	1.2
شِعر	poetry	3.55556	1.29352	3.5	1.37
شرطي	policeman	4.66667	0.685994	4.93	0.26
شرطية	Policewoman	4.44444	0.855585
سجن	prison	4.33333	0.840168	4.68	0.67
خصوصية	privacy	1.61111	0.978528	1.5	0.58
منتج	product	3.94444	1.10997	4.17	1.14
برنامج	program	3.44444	1.42343	3.43	1.45
بلوغ	puberty	3.05556	1.47418	3.5	1.46
نقاء	purity	2.125	1.08781	1.73	1.01
تكاثر	reproduction	3.22222	1.55509	4.79	0.41
مسؤولية	responsibility	1.66667	1.08465	1.4	0.67
غرفة	room	4.72222	0.669113	4.79	0.41
مدرسة	school	4.5	0.785905	4.79	0.57
قطاع	sector	2.11111	1.36722	3.41	1.18
قميص	shirt	4.77778	0.548319	4.94	0.38
حذاء	shoe	4.83333	0.514496	4.97	0.18
تسوق	shopping	3.44444	1.24722	3.44	1.37
أريكة	sofa	4.8125	0.75	4.9	0.4
ابن	son	4.05556	0.998365	4.14	1.27
أغنية	song	4.27778	0.894792	4.46	0.95
عنكبوت	spider	4.66667	0.840168	4.97	0.18
روحانية	spirituality	1.27778	0.574513	1.07	0.37
طالبة	student (female)	4.44444	0.783823	4.92	0.28
طالب	student (male)	4.33333	0.766965	4.92	0.28
شمس	sun	4.83333	0.383482	4.83	0.6
شروق	sunrise	4.05556	1.25895	4.69	0.54
غروب	sunset	4.44444	0.783823	4.54	0.88
طاولة	table	4.83333	0.514496	4.9	0.41
تاكسي	taxi	4.76471	0.664211	4.93	0.26
معلمة	teacher (female)	4.5	0.618347	4.52	0.74
معلم	teacher (male)	4.44444	0.615699	4.52	0.74
معبد	temple	4.05556	1.43372	4.53	0.72
تذكرة	ticket	4.5	1.20049	4.7	0.65
تسامح	tolerance	1.55556	0.983524	2.11	1.19
بلدة	town	3.55556	1.58011	4.64	0.78
تقاليد	tradition	1.72222	1.07406	1.69	0.85
شجرة	tree	4.72222	0.95828	5	0
دفء	warmth	3.27778	1.36363	3.39	1.47
زفاف	wedding	4.16667	1.04319	3.92	1.32
زوجة	wife	4.11111	1.02262	4.13	1.11
نافذة	window	4.77778	0.732084	4.86	0.52
حكمة	wisdom	1.61111	0.697802	1.53	0.86
امرأة	woman	4.66667	0.594089	4.46	1.03
عاملة	worker (female)	4.27778	0.894792	4.59	0.73
عامل	worker (male)	4.38889	0.777544	4.59	0.73
عبادة	Worship	2.5	1.46528
