# Supplementary material for: Bridging Behavioral Gaps: Automatic Extrapolation of Concreteness Norms for Arabic and English with a k-Nearest Neighbor Approach
Source: Research Square preprint supplement (doi:10.21203/rs.3.rs-7858980/v1), 2025-11-02
Supplement: Supplementary file 2 [file english_dataset.xlsx]

## Sheet: Sheet1
Word	MWE	Mean	SD	Unknown	Rated	Known	Responses	POS	POS_tag	Frequency
abandonment	0	2.54	1.29	0	28	1	49	Noun	NN	27203
abbreviation	0	3.07	1.51	0	29	1	12	Noun	NN	23826
abdomen	0	4.7	0.67	0	27	1	171	Noun	NN	33380
abduction	0	3.07	1.47	0	27	1	185	Noun	NN	24010
ability	0	1.81	0.88	0	27	1	980	Noun	NN	1224979
abnormality	0	2.48	1.33	0	25	1	26	Noun	NN	33926
abode	0	3.92	1.38	2	26	0.92	33	Noun	NN	16809
abolition	0	2.43	1.5	1	29	0.97	10	Noun	NN	38209
abomination	0	2.23	1.24	0	26	1	58	Noun	NN	16830
abortion	0	3.41	1.39	0	27	1	369	Noun	NN	198283
absence	0	2.31	1.35	0	26	1	322	Noun	NN	297260
absentee	0	3.29	1.38	0	28	1	18	Noun	NN	13106
absorption	0	3.22	1.48	0	27	1	18	Noun	NN	47545
abstinence	0	1.72	1.28	0	29	1	45	Noun	NN	16433
abstraction	0	1.57	1	0	28	1	15	Noun	NN	49502
absurdity	0	1.25	0.59	1	29	0.97	32	Noun	NN	26896
abundance	0	2.21	1.2	1	29	0.97	45	Noun	NN	93235
abuser	0	3.86	1.51	2	30	0.93	16	Noun	NN	24880
abyss	0	3.07	1.7	0	28	1	90	Noun	NN	18253
academia	0	2.12	1.26	3	27	0.89	12	Noun	NN	45596
academy	0	4.29	1.12	0	28	1	633	Noun	NN	88338
acceleration	0	2.97	1.3	0	29	1	44	Noun	NN	54699
accelerator	0	4.32	1.06	0	28	1	69	Noun	NN	25388
acceptance	0	2.21	1.26	0	28	1	161	Noun	NN	158637
accessibility	0	2.3	1.23	0	27	1	2	Noun	NN	86229
accident	0	3.26	1.48	0	27	1	4146	Noun	NN	451655
accolade	0	2.46	1.32	2	30	0.93	1	Noun	NN	25139
accommodation	0	2.96	1.19	0	27	1	48	Noun	NN	375793
accompaniment	0	2.26	1.02	1	28	0.96	15	Noun	NN	28373
accomplice	0	3.34	1.37	0	29	1	216	Noun	NN	15167
accomplishment	0	2.5	1.37	0	28	1	96	Noun	NN	84812
accordion	0	4.86	0.59	1	29	0.97	67	Noun	NN	12027
accountability	0	1.55	0.99	0	29	1	24	Noun	NN	114651
accountancy	0	1.68	1.02	2	30	0.93	3	Noun	NN	20566
accountant	0	4.41	0.91	0	29	1	315	Noun	NN	79047
accounting	0	3.27	1.66	0	26	1	230	Noun	NN	145640
accreditation	0	2.68	1.39	1	29	0.97	9	Noun	NN	47642
accumulation	0	2.97	1.43	0	30	1	13	Noun	NN	54388
accuracy	0	1.85	1.23	0	27	1	76	Noun	NN	179452
accusation	0	2.38	1.24	0	29	1	143	Noun	NN	98004
accuser	0	3.44	1.58	0	27	1	15	Noun	NN	11069
ace	0	3.92	1.47	1	27	0.96	751	Noun	NN	40499
achievement	0	2.37	1.5	0	30	1	178	Noun	NN	355966
acidity	0	3.4	1.35	1	26	0.96	10	Noun	NN	15125
acknowledgement	0	2.62	1.42	0	29	1	21	Noun	NN	36834
acne	0	4.89	0.32	0	27	1	46	Noun	NN	29558
acorn	0	4.96	0.19	0	27	1	37	Noun	NN	14654
acoustics	0	3.12	1.24	0	25	1	22	Noun	NN	11937
acquaintance	0	3.41	1.18	0	29	1	273	Noun	NN	53320
acquisition	0	2.6	1.41	0	25	1	74	Noun	NN	180249
acre	0	4.18	1.22	0	28	1	93	Noun	NN	250243
acronym	0	2.64	1.52	0	28	1	15	Noun	NN	25920
action	0	2.86	1.36	0	29	1	3115	Noun	NN	2291327
activation	0	2.41	1.31	0	27	1	43	Noun	NN	53676
activism	0	1.79	1.08	0	29	1	9	Noun	NN	46644
activity	0	2.72	1.4	0	25	1	657	Noun	NN	2063222
actor	0	4.57	0.9	0	30	1	1343	Noun	NN	398198
actress	0	4.54	0.84	0	28	1	817	Noun	NN	104773
actuality	0	1.96	1.34	0	27	1	24	Noun	NN	16958
acupuncture	0	3.83	1.23	0	29	1	37	Noun	NN	37663
ad	0	4.46	1.14	0	28	1	694	Noun	NN	496761
adage	0	1.86	0.94	4	26	0.85	32	Noun	NN	13878
adaptation	0	2.04	0.96	0	28	1	81	Noun	NN	129815
adapter	0	3.82	1.09	0	28	1	11	Noun	NN	45768
adaptor	0	4.04	1.09	0	27	1	4	Noun	NN	17996
addendum	0	3.44	1.45	2	29	0.93	15	Noun	NN	10750
addiction	0	2.85	1.41	0	26	1	199	Noun	NN	101645
adequacy	0	1.86	1.08	2	30	0.93	1	Noun	NN	15210
adherence	0	1.5	0.66	1	25	0.96	9	Noun	NN	35118
adhesion	0	3.32	1.31	0	28	1	6	Noun	NN	13139
adjudication	0	2.35	1.32	3	29	0.9	9	Noun	NN	21770
adjustment	0	2.81	1.33	0	27	1	158	Noun	NN	180678
admin	0	2.96	1.43	1	28	0.96	22	Noun	NN	64211
administration	0	2.78	1.45	0	27	1	387	Noun	NN	567162
administrator	0	3.89	1.25	0	27	1	84	Noun	NN	173550
admiral	0	4.11	1.22	0	27	1	845	Noun	NN	11866
admiration	0	1.86	1.06	0	29	1	107	Noun	NN	47420
admirer	0	2.93	1.25	0	28	1	151	Noun	NN	24284
admission	0	2.83	1.32	0	30	1	181	Noun	NN	237409
adolescence	0	2.81	1.38	19	5885	1	44	Noun	NN	20973
adopter	0	3.33	1.27	1	28	0.96	1	Noun	NN	20420
adoption	0	3.03	1.45	0	29	1	239	Noun	NN	183488
adoration	0	2.19	1.24	1	28	0.96	30	Noun	NN	12029
adrenaline	0	3.04	1.43	0	27	1	168	Noun	NN	19572
adultery	0	2.79	1.5	1	30	0.97	99	Noun	NN	27910
adulthood	0	2.5	1.5	0	28	1	37	Noun	NN	32501
advancement	0	2.1	1.21	0	30	1	63	Noun	NN	63116
advantage	0	2	1.12	0	28	1	1125	Noun	NN	779466
advent	0	2.48	1.19	2	27	0.93	24	Noun	NN	51528
adventure	0	2.59	1.42	0	27	1	685	Noun	NN	274370
adventurer	0	3.73	1.28	1	27	0.96	37	Noun	NN	18920
adversary	0	2.93	1.16	1	30	0.97	77	Noun	NN	38684
adversity	0	1.44	0.75	0	27	1	54	Noun	NN	20999
advertisement	0	3.77	1.45	0	26	1	61	Noun	NN	113433
advertiser	0	3.93	1.23	0	30	1	8	Noun	NN	63310
advertising	0	3.88	0.95	0	26	1	379	Noun	NN	316441
advice	0	2.73	1.2	0	30	1	2447	Noun	NN	1033257
adviser	0	3.67	1.4	0	24	1	53	Noun	NN	151890
advisor	0	4.15	0.95	0	27	1	225	Noun	NN	138179
advocacy	0	2	1.22	0	28	1	15	Noun	NN	90614
aerosol	0	4.23	1.07	0	30	1	14	Noun	NN	25382
aesthetics	0	2.22	1.15	2	29	0.93	15	Noun	NN	39326
affair	0	2.45	1.27	0	29	1	1502	Noun	NN	364692
affection	0	2.22	1.53	0	27	1	431	Noun	NN	85963
affidavit	0	4	1.49	0	30	1	100	Noun	NN	29769
affiliation	0	1.93	1.05	0	30	1	25	Noun	NN	49868
affirmation	0	2.12	0.95	1	27	0.96	27	Noun	NN	26596
affliction	0	2.27	1.17	0	30	1	60	Noun	NN	21315
affordability	0	1.93	1.03	0	29	1	1	Noun	NN	20750
aficionado	0	2.55	1.18	3	25	0.88	11	Noun	NN	12121
afterlife	0	1.9	1.32	0	30	1	81	Noun	NN	20385
aftermarket	0	3.58	1.45	2	28	0.93	2	Noun	NN	11591
aftermath	0	1.97	1.12	0	29	1	53	Noun	NN	61886
afternoon	0	3.7	1.49	0	27	1	4666	Noun	NN	455536
afterthought	0	2.04	1.25	0	26	1	13	Noun	NN	11553
agency	0	3.87	1.23	0	31	1	991	Noun	NN	955328
agenda	0	2.66	1.32	0	29	1	373	Noun	NN	342955
agent	0	3.61	1.34	0	28	1	5235	Noun	NN	731588
aggregation	0	2.16	1.18	4	29	0.86	2	Noun	NN	22273
aggression	0	2.68	1.25	0	28	1	143	Noun	NN	75537
aggressor	0	3.29	1.27	0	28	1	29	Noun	NN	12535
agility	0	2.38	1.4	0	29	1	23	Noun	NN	26446
agitation	0	2.33	1.39	0	27	1	25	Noun	NN	21163
agony	0	2.38	1.47	0	29	1	191	Noun	NN	35366
agreement	0	2.22	1.15	0	27	1	892	Noun	NN	825615
agriculture	0	3.67	1.44	0	27	1	56	Noun	NN	151508
aide	0	3.59	1.21	0	29	1	103	Noun	NN	42496
ailment	0	2.93	1.39	0	28	1	26	Noun	NN	27530
airbag	0	4.81	0.63	1	27	0.96	20	Noun	NN	17477
aircraft	0	4.4	1.12	1	26	0.96	482	Noun	NN	315728
airfield	0	4.7	0.56	2	25	0.92	118	Noun	NN	26785
airflow	0	3.59	1.24	0	29	1	7	Noun	NN	12510
airline	0	4	1.39	0	30	1	331	Noun	NN	135355
airliner	0	4.45	1.27	0	29	1	29	Noun	NN	12080
airplane	0	4.96	0.19	0	28	1	557	Noun	NN	72548
airport	0	4.87	0.43	0	30	1	1940	Noun	NN	333781
airship	0	4.92	0.27	1	27	0.96	30	Noun	NN	10407
airspace	0	3.58	1.33	0	26	1	82	Noun	NN	15089
airway	0	4.34	0.97	0	29	1	83	Noun	NN	19310
aisle	0	4.35	1.06	0	26	1	379	Noun	NN	51031
album	0	4.69	0.68	1	27	0.96	522	Noun	NN	643865
alchemy	0	2.1	1.32	1	30	0.97	11	Noun	NN	12126
alcohol	0	4.76	0.51	0	29	1	845	Noun	NN	328849
alcoholism	0	2.93	1.25	0	29	1	43	Noun	NN	20450
ale	0	4.65	0.63	1	27	0.96	202	Noun	NN	45721
algae	0	4.93	0.27	0	27	1	22	Noun	NN	44057
algebra	0	3.14	1.35	0	28	1	90	Noun	NN	33370
algorithm	0	3.07	1.63	0	28	1	27	Noun	NN	178149
alienation	0	1.73	0.92	0	26	1	22	Noun	NN	23993
alignment	0	3.26	1.37	0	31	1	67	Noun	NN	73042
allegation	0	1.79	1.03	0	28	1	27	Noun	NN	160784
allegiance	0	1.77	1.01	0	30	1	159	Noun	NN	38661
allegory	0	2.07	1.41	2	29	0.93	12	Noun	NN	16128
allergen	0	3.93	1.13	0	29	1	3	Noun	NN	14787
allergy	0	3.68	1.12	0	28	1	86	Noun	NN	74929
alley	0	4.82	0.48	0	28	1	831	Noun	NN	41541
alleyway	0	4.3	1.15	0	23	1	40	Noun	NN	10255
alliance	0	2.5	1.33	0	30	1	465	Noun	NN	119927
alligator	0	4.96	0.19	0	28	1	178	Noun	NN	12673
allocation	0	2.32	1.39	0	28	1	10	Noun	NN	106133
allotment	0	2.88	1.45	0	26	1	19	Noun	NN	32648
allowance	0	3.07	1.52	0	27	1	265	Noun	NN	133502
alloy	0	4.29	0.98	1	29	0.97	52	Noun	NN	55006
allusion	0	1.58	1.17	2	28	0.93	6	Noun	NN	25776
alpha	0	1.81	1.06	1	27	0.96	414	Noun	NN	50571
alphabet	0	4.31	1.31	0	29	1	127	Noun	NN	38330
altar	0	4.85	0.61	0	26	1	259	Noun	NN	62888
alteration	0	3.21	1.32	0	29	1	36	Noun	NN	79871
alternator	0	4.27	1.04	1	27	0.96	18	Noun	NN	17478
altitude	0	2.96	1.57	0	28	1	198	Noun	NN	66872
altruism	0	1.5	1.19	3	25	0.88	11	Noun	NN	12484
amazement	0	1.89	1.01	0	27	1	36	Noun	NN	20227
ambassador	0	4.28	1.1	0	29	1	689	Noun	NN	87219
ambiance	0	2.31	1.42	0	29	1	8	Noun	NN	10701
ambience	0	1.72	1.03	0	29	1	37	Noun	NN	21128
ambiguity	0	1.3	0.82	0	27	1	14	Noun	NN	47411
ambition	0	1.74	0.98	0	27	1	273	Noun	NN	140973
ambivalence	0	1.7	0.82	2	29	0.93	12	Noun	NN	11179
ambulance	0	4.81	0.8	0	26	1	1143	Noun	NN	71526
amendment	0	2.44	1.39	0	25	1	209	Noun	NN	273212
amends	0	1.92	1.09	0	26	1	94	Noun	NN	10642
amino	0	2.74	1.71	3	26	0.88	31	Noun	NN	37524
ammo	0	4.85	0.37	2	28	0.93	274	Noun	NN	23050
ammonia	0	4.44	1.12	0	25	1	76	Noun	NN	35143
ammunition	0	4.88	0.33	0	26	1	300	Noun	NN	54030
amnesia	0	3.61	1.37	0	28	1	189	Noun	NN	11167
amp	0	3.59	1.45	1	28	0.96	93	Noun	NN	121674
amplification	0	2.93	1.34	0	30	1	8	Noun	NN	17552
amplifier	0	4.79	0.62	0	29	1	16	Noun	NN	45008
amplitude	0	2.92	1.29	4	30	0.87	6	Noun	NN	22279
amputation	0	3.76	1.12	1	30	0.97	43	Noun	NN	11651
amusement	0	2.07	1.21	0	27	1	191	Noun	NN	45443
analogy	0	1.61	0.88	0	28	1	58	Noun	NN	99367
analysis	0	2.56	1.45	0	27	1	563	Noun	NN	1072857
analyst	0	4.23	1.19	0	30	1	177	Noun	NN	175340
anarchism	0	1.92	1.18	1	25	0.96	2	Noun	NN	16326
anarchist	0	2.83	1.44	0	29	1	29	Noun	NN	68745
anarchy	0	2.12	1.31	0	26	1	103	Noun	NN	23083
anatomy	0	3.59	1.34	0	27	1	163	Noun	NN	44641
ancestor	0	3.24	1.2	0	25	1	86	Noun	NN	117416
ancestry	0	2.83	1.56	0	30	1	24	Noun	NN	27477
anecdote	0	2.64	1.42	0	28	1	55	Noun	NN	46039
anemia	0	3.25	1.21	1	29	0.97	35	Noun	NN	12810
anesthesia	0	3.41	1.7	0	29	1	101	Noun	NN	12304
angel	0	3.82	1.49	0	28	1	3992	Noun	NN	175276
angler	0	4.14	1.3	1	29	0.97	19	Noun	NN	47937
angst	0	1.96	1.09	2	29	0.93	47	Noun	NN	17688
animation	0	3.41	1.42	0	27	1	62	Noun	NN	142665
animator	0	4	1	0	29	1	2	Noun	NN	12354
animosity	0	2.11	0.99	1	29	0.97	31	Noun	NN	13954
ankle	0	4.81	0.79	0	27	1	409	Noun	NN	68192
annexation	0	2.32	1.31	4	29	0.86	7	Noun	NN	10577
annihilation	0	2.69	1.32	1	27	0.96	41	Noun	NN	14664
anniversary	0	3.15	1.54	0	27	1	939	Noun	NN	188150
announcement	0	2.79	1.52	1	29	0.97	525	Noun	NN	231829
announcer	0	4.52	0.8	0	27	1	574	Noun	NN	15014
annoyance	0	2.14	1.25	0	29	1	25	Noun	NN	28967
annuity	0	2.64	1.52	1	29	0.97	18	Noun	NN	31460
anomaly	0	1.79	0.93	1	25	0.96	63	Noun	NN	55317
anonymity	0	1.88	1.12	1	25	0.96	46	Noun	NN	35602
anorexia	0	3.41	1.3	0	29	1	13	Noun	NN	11185
ant	0	4.86	0.52	0	29	1	273	Noun	NN	65238
antagonism	0	2.33	1.27	0	30	1	11	Noun	NN	13396
antagonist	0	2.75	1.46	0	28	1	13	Noun	NN	18243
antenna	0	4.75	0.93	0	28	1	122	Noun	NN	72648
anthem	0	3.36	1.16	0	28	1	96	Noun	NN	29119
anthology	0	3.07	1.41	1	30	0.97	14	Noun	NN	46681
anthrax	0	4.44	1.15	0	27	1	66	Noun	NN	16926
anthropologist	0	4	1.31	0	29	1	53	Noun	NN	30375
anthropology	0	2.41	1.59	0	29	1	67	Noun	NN	45592
antibody	0	3.48	1.64	0	29	1	13	Noun	NN	54414
anticipation	0	1.93	1.21	0	28	1	127	Noun	NN	58549
antidepressant	0	3.8	1.54	0	30	1	18	Noun	NN	23702
antidote	0	3.42	1.47	1	27	0.96	221	Noun	NN	18239
antioxidant	0	3.59	1.28	0	27	1	1	Noun	NN	32389
antiquity	0	2.13	1.25	0	30	1	14	Noun	NN	42177
antithesis	0	2.27	1.32	3	25	0.88	16	Noun	NN	13028
anus	0	4.86	0.36	0	28	1	56	Noun	NN	11865
anvil	0	4.96	0.2	1	27	0.96	32	Noun	NN	29178
anxiety	0	2.21	1.03	0	28	1	345	Noun	NN	194198
apartment	0	4.9	0.41	0	29	1	4235	Noun	NN	325423
apathy	0	2.04	1.25	2	28	0.93	24	Noun	NN	20212
apex	0	3.41	1.5	1	30	0.97	43	Noun	NN	18493
aphid	0	4.76	0.72	3	28	0.89	4	Noun	NN	15440
apocalypse	0	2.21	1.5	0	29	1	126	Noun	NN	24493
apologist	0	2.97	1.38	1	30	0.97	1	Noun	NN	21832
apology	0	2.86	1.67	0	28	1	804	Noun	NN	133316
apostle	0	3.22	1.37	0	27	1	71	Noun	NN	71919
apparatus	0	3.78	1.2	0	23	1	77	Noun	NN	62268
apparel	0	4.6	0.71	0	25	1	35	Noun	NN	21419
apparition	0	2.46	1.26	1	29	0.97	39	Noun	NN	14993
appearance	0	2.57	1.62	0	28	1	591	Noun	NN	483541
appendix	0	4.25	1.14	0	28	1	133	Noun	NN	28482
appetite	0	2.74	1.35	0	27	1	456	Noun	NN	79146
appetizer	0	4.71	0.71	0	28	1	61	Noun	NN	13024
applause	0	4.29	0.9	0	28	1	576	Noun	NN	56057
apple	0	5	0	0	30	1	1207	Noun	NN	175638
appliance	0	4.57	0.94	0	30	1	41	Noun	NN	111143
applicability	0	1.69	1.07	0	29	1	2	Noun	NN	17045
applicant	0	4	1.36	0	30	1	31	Noun	NN	325786
application	0	3.4	1.53	0	25	1	510	Noun	NN	2006189
appointee	0	3.5	1.31	0	30	1	4	Noun	NN	15510
appointment	0	3	1.29	0	30	1	1559	Noun	NN	337450
appraisal	0	3.11	1.4	0	28	1	39	Noun	NN	58102
appreciation	0	1.63	1	0	30	1	261	Noun	NN	125951
apprehension	0	1.68	1.06	1	29	0.97	39	Noun	NN	23396
apprenticeship	0	2.7	1.56	0	27	1	7	Noun	NN	58084
appropriateness	0	2.07	1	1	28	0.96	2	Noun	NN	13298
appropriation	0	1.96	1.31	2	27	0.93	8	Noun	NN	41686
approval	0	2.33	1.05	0	24	1	428	Noun	NN	305326
approximation	0	1.85	1.2	0	27	1	3	Noun	NN	31749
apricot	0	4.97	0.18	0	30	1	32	Noun	NN	11972
apron	0	4.87	0.43	0	30	1	136	Noun	NN	19609
aptitude	0	1.54	0.92	0	28	1	55	Noun	NN	18349
aquarium	0	4.77	0.86	2	28	0.93	141	Noun	NN	42771
aquifer	0	4.04	1.27	3	28	0.89	2	Noun	NN	16159
arbitration	0	2	1.21	3	30	0.9	23	Noun	NN	39944
arbitrator	0	3.2	1.35	2	27	0.93	4	Noun	NN	15885
arcade	0	4.74	0.53	0	27	1	111	Noun	NN	41120
archaeologist	0	4.45	0.78	0	29	1	57	Noun	NN	41569
archaeology	0	3.08	1.61	0	25	1	39	Noun	NN	45937
archbishop	0	4.14	1.3	0	28	1	188	Noun	NN	49222
archery	0	3.93	1.36	0	29	1	40	Noun	NN	11600
architect	0	3.74	1.1	0	27	1	334	Noun	NN	177274
architecture	0	3.59	1.31	1	28	0.96	162	Noun	NN	271426
archive	0	3.58	1.39	0	31	1	67	Noun	NN	116248
archives	0	3.93	1.31	0	29	1	129	Noun	NN	92845
archivist	0	3.57	1.43	0	28	1	4	Noun	NN	13928
area	0	3.72	1.28	0	29	1	3821	Noun	NN	4895041
arena	0	4.83	0.47	0	29	1	185	Noun	NN	110328
argument	0	2.85	1.13	0	27	1	867	Noun	NN	1067699
aristocracy	0	2.97	1.38	1	30	0.97	32	Noun	NN	18707
aristocrat	0	3.76	1.18	0	29	1	69	Noun	NN	12091
ark	0	4.67	0.68	2	29	0.93	199	Noun	NN	16239
armchair	0	5	0	0	29	1	21	Noun	NN	21694
armor	0	4.76	0.51	0	29	1	372	Noun	NN	43044
army	0	4.7	0.6	0	30	1	4370	Noun	NN	480521
aroma	0	3.67	1.56	0	30	1	69	Noun	NN	30411
arousal	0	2.83	1.42	0	29	1	19	Noun	NN	10427
arrangement	0	2.3	1.18	0	30	1	482	Noun	NN	473755
array	0	2.54	1.6	0	28	1	108	Noun	NN	244904
arrival	0	3.07	1.44	0	30	1	422	Noun	NN	259624
arrogance	0	1.74	0.98	0	27	1	144	Noun	NN	42455
arrow	0	4.97	0.19	0	29	1	400	Noun	NN	106317
arsenal	0	3.86	1.13	1	30	0.97	102	Noun	NN	82950
arson	0	3.66	1.34	0	29	1	153	Noun	NN	14804
art	0	4.17	1.17	0	29	1	3611	Noun	NN	1561599
artery	0	4.48	0.8	2	29	0.93	271	Noun	NN	51940
arthritis	0	3.5	1.35	0	28	1	99	Noun	NN	53380
article	0	4.33	1.12	0	30	1	998	Noun	NN	1997634
articulation	0	2.65	1.23	1	27	0.96	8	Noun	NN	19836
artifact	0	4.5	0.9	0	30	1	56	Noun	NN	80513
artillery	0	4.31	1.17	1	30	0.97	280	Noun	NN	45716
artisan	0	3.03	1.54	0	31	1	5	Noun	NN	25139
artist	0	4.24	1.06	0	29	1	1460	Noun	NN	919441
artistry	0	2	1.32	2	26	0.92	24	Noun	NN	12772
artwork	0	4.42	0.9	0	26	1	78	Noun	NN	114915
asbestos	0	4.52	0.89	1	28	0.96	66	Noun	NN	45239
ascension	0	2.37	1.19	1	31	0.97	44	Noun	NN	12335
ascent	0	2.61	1.09	0	31	1	16	Noun	NN	32019
asparagus	0	4.96	0.19	0	28	1	50	Noun	NN	15335
aspect	0	1.82	1.1	35	5878	0.99	197	Noun	NN	934861
asphalt	0	4.83	0.75	0	30	1	49	Noun	NN	15502
aspiration	0	1.81	1.33	0	27	1	29	Noun	NN	99419
aspirin	0	4.76	0.79	0	29	1	395	Noun	NN	21297
assailant	0	3.96	1.16	0	27	1	75	Noun	NN	13299
assassin	0	4.43	0.96	0	28	1	302	Noun	NN	29424
assassination	0	3.8	1.19	0	25	1	281	Noun	NN	65022
assemblage	0	3	1.3	2	29	0.93	6	Noun	NN	22152
assembly	0	3.79	1.15	0	29	1	245	Noun	NN	216250
assertion	0	2.2	1.22	0	25	1	14	Noun	NN	116497
assessment	0	2.11	1.19	0	27	1	158	Noun	NN	693135
assessor	0	2.96	1.49	4	29	0.86	11	Noun	NN	24645
asset	0	2.92	1.32	1	27	0.96	193	Noun	NN	480605
asshole	0	4.08	1.23	2	28	0.93	3142	Noun	NN	26771
assignment	0	3.86	1.35	0	28	1	912	Noun	NN	194430
assimilation	0	2.03	1.35	1	31	0.97	10	Noun	NN	18696
assistance	0	2.25	1.21	0	28	1	558	Noun	NN	407173
association	0	2.3	1.27	0	27	1	414	Noun	NN	419027
assortment	0	2.5	1.39	0	26	1	37	Noun	NN	27539
assumption	0	1.84	1.04	0	31	1	170	Noun	NN	308674
assurance	0	1.76	1.02	0	29	1	104	Noun	NN	119077
asterisk	0	4	1.5	1	27	0.96	23	Noun	NN	10424
asteroid	0	4.86	0.45	1	29	0.97	86	Noun	NN	51848
asthma	0	3.71	1.44	0	28	1	197	Noun	NN	59708
astonishment	0	2.92	1.32	0	26	1	14	Noun	NN	14872
astrologer	0	3.78	1.42	1	28	0.96	14	Noun	NN	17790
astrology	0	2.48	1.58	0	27	1	47	Noun	NN	36509
astronaut	0	4.75	0.65	0	28	1	202	Noun	NN	42469
astronomer	0	4.27	1.36	0	30	1	36	Noun	NN	54080
astronomy	0	3.03	1.5	0	29	1	67	Noun	NN	47138
asylum	0	4.41	1.02	0	29	1	234	Noun	NN	90660
asymmetry	0	2.89	1.5	0	28	1	3	Noun	NN	13000
atheism	0	2.23	1.36	0	30	1	5	Noun	NN	36651
atheist	0	2.93	1.46	0	30	1	55	Noun	NN	101877
athlete	0	4.3	1.1	0	27	1	235	Noun	NN	173903
athletics	0	3.65	1.32	0	26	1	32	Noun	NN	30395
atlas	0	4.79	0.77	0	29	1	52	Noun	NN	20110
atmosphere	0	3.04	1.45	0	28	1	493	Noun	NN	382089
atom	0	3.34	1.59	0	29	1	140	Noun	NN	107868
atonement	0	1.44	0.85	2	29	0.93	18	Noun	NN	18309
atrium	0	4.72	0.74	2	27	0.93	36	Noun	NN	12976
atrocity	0	2.15	1.12	2	28	0.93	32	Noun	NN	49664
attachment	0	3.04	1.4	0	27	1	59	Noun	NN	117615
attacker	0	4.04	1.29	0	27	1	73	Noun	NN	59531
attainment	0	2.13	1.1	3	26	0.88	3	Noun	NN	45368
attendance	0	3.07	1.33	0	27	1	135	Noun	NN	165662
attendee	0	3.79	1.4	0	29	1	1	Noun	NN	73551
attention	0	2.3	1.32	0	27	1	5032	Noun	NN	1117691
attic	0	4.53	1.17	0	30	1	400	Noun	NN	31850
attitude	0	1.97	1.02	0	29	1	1330	Noun	NN	519654
attorney	0	4.52	0.94	0	27	1	2060	Noun	NN	241772
attraction	0	2.24	1.35	0	29	1	348	Noun	NN	212867
attractiveness	0	2.14	1.36	0	29	1	9	Noun	NN	14597
attribution	0	2.04	1.31	2	28	0.93	4	Noun	NN	25320
audacity	0	1.62	0.71	1	25	0.96	48	Noun	NN	17701
audience	0	4.29	0.9	0	28	1	1294	Noun	NN	847574
auditor	0	3.38	1.6	0	26	1	24	Noun	NN	46401
auditorium	0	4.7	0.95	0	27	1	80	Noun	NN	23947
aunt	0	4.17	1.18	0	30	1	2815	Noun	NN	66712
aura	0	2.67	1.33	0	27	1	93	Noun	NN	25804
austerity	0	1.38	0.64	3	29	0.9	5	Noun	NN	53805
authentication	0	2	1.02	0	28	1	14	Noun	NN	50403
authenticity	0	1.74	1.2	0	27	1	59	Noun	NN	50072
author	0	4.26	1.1	0	27	1	405	Noun	NN	1218573
authority	0	2.34	1.29	0	29	1	1082	Noun	NN	1312884
authorization	0	2.45	1.33	0	29	1	184	Noun	NN	48181
authorship	0	2.52	1.4	0	29	1	5	Noun	NN	21316
autism	0	2.69	1.49	0	29	1	36	Noun	NN	112710
auto	0	4	1.36	0	28	1	391	Noun	NN	142085
autobiography	0	3.74	1.4	0	27	1	41	Noun	NN	40192
automation	0	2.48	1.34	0	27	1	9	Noun	NN	43681
automobile	0	4.96	0.19	0	27	1	291	Noun	NN	62873
autonomy	0	2.04	1.1	2	27	0.93	27	Noun	NN	67974
autopsy	0	4.29	1.3	1	29	0.97	489	Noun	NN	19967
autumn	0	3.27	1.32	0	22	1	193	Noun	NN	123279
availability	0	2.32	1.42	0	28	1	30	Noun	NN	195665
avalanche	0	4.32	1.06	0	28	1	173	Noun	NN	16777
avatar	0	3.21	1.68	0	29	1	14	Noun	NN	37348
avenue	0	4	1.36	0	30	1	861	Noun	NN	62319
aversion	0	1.85	1.16	0	26	1	68	Noun	NN	20338
aviation	0	3.39	1.57	0	28	1	73	Noun	NN	61168
aviator	0	4.57	0.57	0	28	1	28	Noun	NN	10948
avocado	0	4.89	0.58	0	27	1	62	Noun	NN	16146
avoidance	0	1.86	0.97	0	28	1	26	Noun	NN	44871
awakening	0	3.07	1.56	0	29	1	63	Noun	NN	25044
awareness	0	1.84	1.03	0	25	1	115	Noun	NN	357932
awning	0	4.61	0.92	0	28	1	24	Noun	NN	13393
axiom	0	2	1.2	2	28	0.93	7	Noun	NN	22783
axis	0	3.57	1.37	0	28	1	81	Noun	NN	86465
axle	0	4.5	1.14	1	27	0.96	63	Noun	NN	33744
babe	0	3.67	1.47	0	27	1	1814	Noun	NN	21783
baby	0	5	0	0	28	1	25978	Noun	NN	778619
bachelor	0	4.32	1.07	0	25	1	504	Noun	NN	47508
backbone	0	4.19	1.14	1	28	0.96	84	Noun	NN	34815
backdrop	0	4.48	0.91	0	29	1	24	Noun	NN	62740
backer	0	2.8	1.55	2	27	0.93	54	Noun	NN	21561
background	0	3.26	1.36	0	23	1	899	Noun	NN	723774
backlash	0	1.85	1.03	0	27	1	7	Noun	NN	29811
backlog	0	3.29	1.51	1	29	0.97	17	Noun	NN	21197
backpack	0	4.96	0.19	0	28	1	186	Noun	NN	30634
backside	0	4.07	1.38	0	27	1	85	Noun	NN	18962
backyard	0	4.57	0.92	0	28	1	369	Noun	NN	44535
bacon	0	4.9	0.56	0	29	1	605	Noun	NN	59070
bacterium	0	3.69	1.28	1	30	0.97	9	Noun	NN	155290
badge	0	4.93	0.26	0	28	1	778	Noun	NN	103332
bag	0	4.9	0.55	0	30	1	4796	Noun	NN	544296
bagel	0	5	0	0	28	1	156	Noun	NN	10924
baggage	0	4.43	1.1	0	28	1	318	Noun	NN	42535
bailiff	0	4.5	0.96	2	30	0.93	110	Noun	NN	15373
bakery	0	4.83	0.38	0	29	1	179	Noun	NN	29483
balcony	0	4.68	0.72	0	28	1	373	Noun	NN	81392
ball	0	5	0	0	28	1	5353	Noun	NN	721485
ballad	0	3.88	1.2	0	25	1	72	Noun	NN	43907
ballet	0	4.04	0.98	0	27	1	523	Noun	NN	49092
ballot	0	4.73	0.64	0	30	1	69	Noun	NN	136757
ballpark	0	4.43	1.07	0	30	1	89	Noun	NN	10282
ballroom	0	4.7	0.82	0	27	1	220	Noun	NN	16904
bamboo	0	4.86	0.74	0	29	1	80	Noun	NN	30080
banana	0	5	0	0	29	1	547	Noun	NN	67960
band	0	4.68	0.77	0	28	1	2724	Noun	NN	883506
bandit	0	4.36	0.95	0	28	1	191	Noun	NN	16176
bandwagon	0	3.29	1.49	0	28	1	24	Noun	NN	19743
bandwidth	0	3.19	1.33	0	27	1	25	Noun	NN	67617
banjo	0	4.9	0.4	0	30	1	83	Noun	NN	15239
bank	0	4.78	0.61	0	32	1	4334	Noun	NN	1227345
banker	0	4.43	1.14	0	30	1	243	Noun	NN	110602
banking	0	3.55	1.24	0	29	1	152	Noun	NN	207044
bankruptcy	0	2.68	1.33	0	28	1	121	Noun	NN	102803
banner	0	4.8	0.76	0	30	1	302	Noun	NN	110660
baptism	0	3.41	1.28	0	27	1	61	Noun	NN	63028
barber	0	4.59	0.57	1	28	0.96	279	Noun	NN	14115
bargaining	0	2.76	1.27	0	25	1	106	Noun	NN	46644
barley	0	4.59	1.08	0	27	1	46	Noun	NN	26970
barn	0	4.79	0.57	0	28	1	693	Noun	NN	74358
baron	0	4.14	1.13	2	31	0.94	687	Noun	NN	17837
baroness	0	3.92	1.47	3	28	0.89	134	Noun	NN	29626
baroque	0	2.62	1.24	4	30	0.87	16	Noun	NN	10757
barrel	0	4.86	0.44	0	29	1	542	Noun	NN	129326
barrier	0	4.41	0.93	0	27	1	173	Noun	NN	269910
bartender	0	4.82	0.48	0	28	1	498	Noun	NN	16390
baseball	0	4.86	0.35	0	29	1	1288	Noun	NN	119986
basement	0	4.89	0.31	0	28	1	1074	Noun	NN	88438
basin	0	4.63	0.79	1	28	0.96	96	Noun	NN	81961
basis	0	1.83	0.97	0	29	1	609	Noun	NN	1019373
basket	0	5	0	0	29	1	672	Noun	NN	109531
basketball	0	4.97	0.19	0	29	1	1091	Noun	NN	104142
bass	0	4.31	1.04	0	29	1	385	Noun	NN	164916
bassist	0	4.17	0.82	4	28	0.86	6	Noun	NN	19011
batch	0	3.8	1.19	0	30	1	212	Noun	NN	97618
bathroom	0	4.52	1.19	0	27	1	3145	Noun	NN	298336
bathtub	0	4.92	0.39	0	26	1	311	Noun	NN	14847
baton	0	4.64	1.1	0	28	1	145	Noun	NN	17586
battalion	0	3.75	1.29	2	30	0.93	298	Noun	NN	66384
battery	0	4.67	0.83	0	27	1	633	Noun	NN	409964
battlefield	0	4.54	0.74	0	28	1	165	Noun	NN	51433
battleground	0	4.04	1.16	0	24	1	24	Noun	NN	10757
battleship	0	4.81	0.4	0	27	1	87	Noun	NN	13548
bay	0	4.81	0.62	0	27	1	1236	Noun	NN	152929
beach	0	4.79	0.77	0	29	1	2888	Noun	NN	478935
beacon	0	4.38	0.86	0	29	1	197	Noun	NN	29353
beak	0	4.96	0.19	0	28	1	107	Noun	NN	17836
bean	0	5	0	0	30	1	349	Noun	NN	148638
beard	0	4.96	0.19	0	28	1	643	Noun	NN	45283
bearer	0	3.58	1.28	3	27	0.89	92	Noun	NN	24633
beast	0	4.63	0.67	0	30	1	1252	Noun	NN	133199
beauty	0	2.93	1.57	0	27	1	2460	Noun	NN	373430
bedding	0	4.61	0.88	0	31	1	38	Noun	NN	32482
bedrock	0	4.46	0.99	3	29	0.9	16	Noun	NN	17892
bedroom	0	4.9	0.3	0	31	1	1872	Noun	NN	435740
bedside	0	3.92	1.12	0	25	1	98	Noun	NN	20845
bedtime	0	2.9	1.54	0	29	1	316	Noun	NN	21700
bee	0	4.88	0.71	0	32	1	528	Noun	NN	179630
beech	0	3.96	1.55	4	27	0.85	18	Noun	NN	10892
beekeeper	0	4.67	0.92	1	31	0.97	9	Noun	NN	15403
beer	0	4.88	0.33	0	26	1	3850	Noun	NN	323048
beet	0	4.8	0.76	0	30	1	14	Noun	NN	19298
beginner	0	2.73	1.46	0	30	1	99	Noun	NN	76818
beginning	0	2.5	1.39	0	26	1	3219	Noun	NN	625531
behavior	0	2.19	1.22	0	31	1	1142	Noun	NN	542475
belief	0	1.19	0.68	0	27	1	388	Noun	NN	680047
believer	0	2.73	1.51	0	26	1	174	Noun	NN	156550
bell	0	4.96	0.19	0	28	1	2006	Noun	NN	139914
belly	0	4.8	0.48	0	30	1	794	Noun	NN	71567
bench	0	4.87	0.43	0	30	1	493	Noun	NN	138789
benefactor	0	3.36	1.28	0	28	1	86	Noun	NN	17255
beneficiary	0	3	1.44	0	28	1	69	Noun	NN	71871
bereavement	0	2.33	1.3	0	27	1	23	Noun	NN	15763
bestseller	0	2.59	1.15	0	29	1	35	Noun	NN	18429
betrayal	0	1.76	0.97	0	25	1	216	Noun	NN	37597
beverage	0	4.6	0.91	0	25	1	119	Noun	NN	64261
bibliography	0	3.96	1.26	0	28	1	3	Noun	NN	43629
bidder	0	3.4	1.41	0	25	1	88	Noun	NN	37708
bidding	0	2.69	1.41	0	26	1	234	Noun	NN	41083
bigot	0	3.11	1.37	0	28	1	31	Noun	NN	19604
bigotry	0	2.38	1.15	0	29	1	34	Noun	NN	24573
bike	0	5	0	0	28	1	1320	Noun	NN	429560
biker	0	4.7	0.67	0	27	1	79	Noun	NN	25626
bikini	0	4.96	0.19	0	27	1	188	Noun	NN	18480
bile	0	4.46	0.9	2	28	0.93	40	Noun	NN	16969
billboard	0	4.83	0.59	0	30	1	69	Noun	NN	28218
billing	0	3.54	1.29	0	28	1	101	Noun	NN	45020
billionaire	0	3.22	1.6	0	27	1	98	Noun	NN	28694
binder	0	4.89	0.42	0	28	1	39	Noun	NN	15826
binge	0	3.1	1.45	0	29	1	47	Noun	NN	20139
bingo	0	4	1.52	1	28	0.96	640	Noun	NN	24888
binoculars	0	5	0	0	24	1	80	Noun	NN	20405
biochemistry	0	3.4	1.43	0	30	1	29	Noun	NN	14333
biographer	0	4.41	1.02	0	29	1	22	Noun	NN	17149
biography	0	3.39	1.45	0	28	1	75	Noun	NN	95924
biologist	0	3.96	1.43	0	28	1	64	Noun	NN	46756
biology	0	3.48	1.5	0	29	1	250	Noun	NN	140509
biopsy	0	3.89	1.37	1	29	0.97	79	Noun	NN	27213
biotech	0	3	1.41	1	27	0.96	16	Noun	NN	16894
biotechnology	0	2.9	1.59	0	29	1	8	Noun	NN	29964
bird	0	5	0	0	26	1	2318	Noun	NN	626905
birdie	0	3.79	1.32	1	29	0.97	253	Noun	NN	19730
birth	0	4.46	0.88	0	28	1	1405	Noun	NN	500353
birthday	0	3.2	1.42	0	30	1	4958	Noun	NN	252337
birthplace	0	3.46	1.07	0	28	1	41	Noun	NN	20651
bishop	0	4.21	1.17	0	28	1	855	Noun	NN	149302
bit	0	3.27	1.62	0	30	1	11987	Noun	NN	2779651
bitterness	0	2.36	1.28	0	28	1	72	Noun	NN	28250
biz	0	2.38	1.31	4	28	0.86	95	Noun	NN	11873
blackberry	0	4.97	0.19	0	29	1	38	Noun	NN	21825
blackboard	0	4.72	1.03	1	30	0.97	60	Noun	NN	13945
blackness	0	3.54	1.56	0	26	1	45	Noun	NN	11097
blacksmith	0	4.38	0.85	0	26	1	107	Noun	NN	19627
bladder	0	4.48	1.06	0	29	1	202	Noun	NN	42482
blade	0	4.93	0.26	0	29	1	663	Noun	NN	130759
blasphemy	0	2.22	1.37	0	27	1	75	Noun	NN	20621
blazer	0	4.79	0.56	0	29	1	62	Noun	NN	10450
blender	0	5	0	0	28	1	85	Noun	NN	19965
blessing	0	2.19	1.27	0	27	1	495	Noun	NN	144392
blindness	0	3.73	1.34	0	30	1	67	Noun	NN	29765
bliss	0	1.37	0.74	1	28	0.96	160	Noun	NN	27443
blizzard	0	4.68	0.56	0	25	1	99	Noun	NN	11996
blob	0	4.06	1.21	0	31	1	60	Noun	NN	17202
blockage	0	3.93	1.26	0	30	1	34	Noun	NN	18953
blocker	0	3.67	1.18	2	29	0.93	18	Noun	NN	14113
bloke	0	3.89	1.4	3	31	0.9	238	Noun	NN	65145
blood	0	4.86	0.44	0	29	1	9492	Noun	NN	853781
bloodshed	0	3.83	1.23	0	30	1	100	Noun	NN	16406
bloodstream	0	4.04	1.23	0	28	1	88	Noun	NN	14631
blouse	0	4.96	0.19	0	27	1	272	Noun	NN	12657
blower	0	4.07	1.07	0	27	1	17	Noun	NN	17045
blueberry	0	4.96	0.19	0	27	1	131	Noun	NN	19863
blueprint	0	4.77	0.63	0	30	1	63	Noun	NN	33909
blurb	0	3.04	1.45	1	29	0.97	13	Noun	NN	17606
boar	0	4.8	0.76	0	30	1	111	Noun	NN	15166
boarder	0	3.52	1.47	2	25	0.92	29	Noun	NN	10181
boarding	0	3.44	1.34	0	27	1	564	Noun	NN	16552
boardroom	0	4.66	0.77	0	29	1	39	Noun	NN	14596
boat	0	4.93	0.37	0	30	1	4885	Noun	NN	509322
body	0	4.79	0.49	0	29	1	9972	Noun	NN	2408108
bodyguard	0	4.75	0.8	0	28	1	292	Noun	NN	14340
bodywork	0	3.43	1.55	0	28	1	10	Noun	NN	13393
boiler	0	4.52	1.01	0	27	1	144	Noun	NN	94570
bombardment	0	2.81	1.44	0	26	1	43	Noun	NN	17544
bomber	0	4.45	0.93	1	32	0.97	214	Noun	NN	68198
bombing	0	3.93	1.21	0	28	1	382	Noun	NN	114064
bondage	0	3.65	1.25	0	31	1	87	Noun	NN	22090
bone	0	4.9	0.56	0	29	1	1329	Noun	NN	321606
bonfire	0	4.83	0.38	0	30	1	89	Noun	NN	18864
bonnet	0	4.93	0.26	0	29	1	95	Noun	NN	35524
bonus	0	3.04	1.48	0	28	1	469	Noun	NN	227362
booking	0	3	1.22	0	28	1	116	Noun	NN	112054
bookkeeper	0	4.64	0.86	0	25	1	65	Noun	NN	12025
bookkeeping	0	3.43	1.23	0	28	1	38	Noun	NN	12012
booklet	0	4.72	0.54	0	25	1	28	Noun	NN	66628
bookmark	0	4.9	0.4	0	30	1	21	Noun	NN	38000
bookseller	0	4.43	1.03	0	28	1	5	Noun	NN	15746
bookshop	0	4.84	0.37	0	25	1	41	Noun	NN	24369
bookstore	0	4.89	0.42	0	28	1	200	Noun	NN	41915
boon	0	2.48	1.45	2	27	0.93	108	Noun	NN	17032
booster	0	2.93	1.56	0	28	1	135	Noun	NN	31981
booth	0	4.42	1.3	0	26	1	1039	Noun	NN	66735
booty	0	4.36	0.87	0	28	1	313	Noun	NN	11603
boredom	0	1.96	1.32	0	27	1	109	Noun	NN	26114
borough	0	3.81	1.14	0	27	1	60	Noun	NN	86956
borrower	0	3.27	1.36	0	30	1	4	Noun	NN	76635
bosom	0	4.63	0.69	2	29	0.93	159	Noun	NN	18672
boss	0	3.83	1.42	0	30	1	6339	Noun	NN	260994
botanist	0	4.07	1.21	1	28	0.96	14	Noun	NN	10255
bottle	0	4.91	0.44	5	5898	1	2588	Noun	NN	332667
bottleneck	0	3.97	1.43	0	29	1	26	Noun	NN	17484
bouncer	0	4.38	1.08	0	29	1	81	Noun	NN	10048
boundary	0	3.04	1.02	0	27	1	69	Noun	NN	315862
bounty	0	3.41	1.31	0	27	1	366	Noun	NN	27291
bouquet	0	4.74	0.81	0	27	1	164	Noun	NN	18998
bourbon	0	4.93	0.27	0	27	1	319	Noun	NN	11587
bourgeoisie	0	2.42	1.24	2	28	0.93	15	Noun	NN	21588
bout	0	3	1.22	1	29	0.97	974	Noun	NN	62420
boutique	0	4.27	1.11	0	30	1	55	Noun	NN	42081
bowel	0	4.53	0.68	0	30	1	183	Noun	NN	50161
bowler	0	4.45	0.95	1	30	0.97	67	Noun	NN	19418
bowling	0	4.56	0.89	0	27	1	545	Noun	NN	33350
box	0	4.9	0.41	0	29	1	4577	Noun	NN	1045973
boxer	0	4.63	0.69	0	27	1	196	Noun	NN	38017
boxing	0	4.55	0.83	0	29	1	370	Noun	NN	45303
boy	0	4.76	0.6	0	25	1	27021	Noun	NN	958043
boyfriend	0	4.59	0.73	0	29	1	3684	Noun	NN	103070
bra	0	4.54	1.14	0	26	1	557	Noun	NN	33845
bracelet	0	4.96	0.19	0	28	1	398	Noun	NN	28109
brain	0	4.69	0.74	1	27	0.96	3928	Noun	NN	657753
brainstorm	0	2.55	1.55	0	29	1	40	Noun	NN	10237
brandy	0	4.81	0.62	0	27	1	567	Noun	NN	13805
brass	0	4.7	0.65	0	30	1	618	Noun	NN	79134
brat	0	3.62	1.44	0	26	1	317	Noun	NN	10910
bravery	0	1.96	1.02	0	27	1	147	Noun	NN	26221
bread	0	4.92	0.28	0	24	1	1445	Noun	NN	250736
breadth	0	2.23	1.31	3	29	0.9	22	Noun	NN	55402
breakdown	0	2.75	1.51	0	28	1	373	Noun	NN	107036
breaker	0	3.85	1.26	0	27	1	117	Noun	NN	28945
breakfast	0	4.43	1.1	0	30	1	3381	Noun	NN	354647
breakout	0	3.41	1.45	0	27	1	16	Noun	NN	17707
breakthrough	0	1.87	1.28	0	31	1	175	Noun	NN	67666
breakup	0	2	1.28	0	28	1	149	Noun	NN	14562
breast	0	4.89	0.42	0	27	1	457	Noun	NN	290525
breath	0	4.36	0.95	0	28	1	2291	Noun	NN	223357
breather	0	3.44	1.33	3	28	0.89	62	Noun	NN	10684
breeder	0	3.13	1.46	0	30	1	40	Noun	NN	54129
breeding	0	2.96	1.32	0	28	1	186	Noun	NN	65370
brethren	0	3.25	1.62	1	29	0.97	68	Noun	NN	45289
brevity	0	2.23	1.31	3	29	0.9	11	Noun	NN	11471
brewery	0	4.62	0.64	1	27	0.96	92	Noun	NN	39666
brewing	0	3.07	1.31	0	30	1	48	Noun	NN	23414
bribery	0	2.89	1.4	1	29	0.97	69	Noun	NN	18521
brick	0	4.83	0.75	0	30	1	519	Noun	NN	159804
brickwork	0	4.48	0.75	2	29	0.93	2	Noun	NN	10455
bride	0	4.63	0.74	0	27	1	1235	Noun	NN	72804
bridesmaid	0	4.41	0.93	0	27	1	125	Noun	NN	12978
briefcase	0	4.86	0.52	0	29	1	438	Noun	NN	10535
briefing	0	2.79	1.42	0	28	1	233	Noun	NN	71830
brigade	0	4.3	0.95	2	29	0.93	163	Noun	NN	94998
brightness	0	3.43	1.45	0	28	1	30	Noun	NN	49053
brilliance	0	2.39	1.34	0	28	1	75	Noun	NN	28334
brink	0	2.48	1.33	0	29	1	127	Noun	NN	29587
bro	0	3.27	1.25	2	28	0.93	1270	Noun	NN	12892
broadcaster	0	4.35	1.13	0	26	1	7	Noun	NN	57121
broadcasting	0	3.52	1.28	0	27	1	163	Noun	NN	45852
broccoli	0	4.87	0.51	0	30	1	116	Noun	NN	18074
brochure	0	4.76	0.83	0	29	1	97	Noun	NN	60208
broker	0	4.03	1.33	0	30	1	185	Noun	NN	97258
brokerage	0	3.61	1.31	2	25	0.92	28	Noun	NN	16447
broom	0	4.89	0.42	0	27	1	243	Noun	NN	20033
broth	0	4.68	0.61	0	28	1	45	Noun	NN	19641
brothel	0	4.23	1.03	1	27	0.96	82	Noun	NN	15888
brother	0	4.43	0.82	0	30	1	14481	Noun	NN	737464
brotherhood	0	2.58	1.21	0	26	1	212	Noun	NN	16716
brow	0	4.39	1.03	0	28	1	94	Noun	NN	34892
brownie	0	4.82	0.48	1	29	0.97	180	Noun	NN	18183
browser	0	4.26	1.2	1	28	0.96	9	Noun	NN	313703
brunch	0	4.41	1.02	1	30	0.97	189	Noun	NN	13173
brunt	0	2.21	1.2	1	29	0.97	25	Noun	NN	13872
brutality	0	2.48	1.21	0	29	1	112	Noun	NN	31395
bucket	0	4.96	0.2	0	26	1	511	Noun	NN	92176
buddy	0	3.48	1.55	0	29	1	5247	Noun	NN	76442
budget	0	3.14	1.41	0	29	1	513	Noun	NN	788931
builder	0	3.97	1.4	0	30	1	48	Noun	NN	110149
building	0	4.64	0.91	0	28	1	5078	Noun	NN	1734818
buildup	0	3.08	1.35	0	26	1	59	Noun	NN	13840
bulb	0	4.93	0.27	1	28	0.96	200	Noun	NN	124799
bulkhead	0	4.17	1.13	3	27	0.89	48	Noun	NN	11340
bull	0	4.85	0.53	0	27	1	1403	Noun	NN	91505
bulldozer	0	4.9	0.41	0	29	1	66	Noun	NN	11755
bullet	0	4.83	0.82	0	24	1	1950	Noun	NN	141379
bulletin	0	4.72	0.59	0	29	1	183	Noun	NN	44638
bun	0	4.88	0.43	0	26	1	147	Noun	NN	24960
bunch	0	3.5	1.36	0	30	1	3003	Noun	NN	259905
bungalow	0	4.63	0.61	0	30	1	84	Noun	NN	31578
bunny	0	4.97	0.19	0	29	1	946	Noun	NN	30014
bureau	0	4.04	1.4	0	27	1	568	Noun	NN	37345
bureaucracy	0	1.64	1.11	1	26	0.96	26	Noun	NN	64463
bureaucrat	0	3.86	1.18	0	28	1	29	Noun	NN	33608
burger	0	4.93	0.26	0	28	1	522	Noun	NN	56244
burglar	0	4.44	0.58	1	28	0.96	282	Noun	NN	20433
burglary	0	3.64	1.22	1	29	0.97	182	Noun	NN	29474
burial	0	3.93	1.11	0	27	1	242	Noun	NN	81161
burner	0	4.78	0.42	0	27	1	93	Noun	NN	39060
bus	0	4.9	0.54	0	31	1	3783	Noun	NN	632545
bushel	0	4.3	1.1	1	28	0.96	32	Noun	NN	18829
business	0	3.28	1.44	0	29	1	16371	Noun	NN	4166683
businessman	0	4.47	0.97	0	30	1	404	Noun	NN	72959
butler	0	4.63	0.72	0	30	1	508	Noun	NN	14895
butterfly	0	4.93	0.26	0	29	1	281	Noun	NN	76029
buttock	0	4.79	0.63	1	29	0.97	17	Noun	NN	12342
button	0	4.96	0.2	0	26	1	1441	Noun	NN	521652
buyer	0	4.36	1.25	0	25	1	264	Noun	NN	268508
buyout	0	2.43	1.43	2	30	0.93	11	Noun	NN	11284
bylaw	0	3	1.75	2	29	0.93	6	Noun	NN	12187
byproduct	0	3.16	1.43	1	26	0.96	13	Noun	NN	12742
bystander	0	4.17	1.07	0	29	1	45	Noun	NN	16650
byte	0	2.68	1.22	0	28	1	6	Noun	NN	76085
cab	0	4.88	0.33	0	26	1	1826	Noun	NN	70255
cabbage	0	4.75	0.65	0	28	1	148	Noun	NN	26974
cabin	0	4.92	0.27	0	26	1	1002	Noun	NN	116110
cabinet	0	4.89	0.32	0	27	1	425	Noun	NN	151656
cable	0	4.74	0.81	0	27	1	1108	Noun	NN	375743
cache	0	3.8	1.32	0	30	1	31	Noun	NN	81679
cactus	0	5	0	0	32	1	148	Noun	NN	14734
cadence	0	2.7	1.32	2	29	0.93	15	Noun	NN	11195
cadet	0	4.21	0.92	0	28	1	176	Noun	NN	20664
cafe	0	4.96	0.19	0	27	1	258	Noun	NN	99609
cafeteria	0	4.71	0.6	0	28	1	289	Noun	NN	18975
caffeine	0	4.04	1.51	0	27	1	150	Noun	NN	34268
cake	0	4.81	0.68	0	27	1	2298	Noun	NN	233279
calamity	0	2	1.17	1	27	0.96	102	Noun	NN	21308
calcium	0	4.07	1.25	0	28	1	90	Noun	NN	68189
calculation	0	3	1.58	0	29	1	32	Noun	NN	177793
calculator	0	4.86	0.44	0	29	1	66	Noun	NN	60199
calculus	0	2.26	1.38	0	27	1	47	Noun	NN	26844
calendar	0	4.62	0.86	0	29	1	363	Noun	NN	183976
calf	0	4.48	0.89	1	28	0.96	151	Noun	NN	58316
caliber	0	3	1.44	0	28	1	139	Noun	NN	20552
calibration	0	3	1.36	0	27	1	11	Noun	NN	37846
caller	0	3.96	1	0	28	1	222	Noun	NN	51749
calorie	0	3.44	1.4	0	27	1	12	Noun	NN	107438
camaraderie	0	2.19	1	1	28	0.96	27	Noun	NN	12519
camcorder	0	5	0	0	30	1	32	Noun	NN	18538
cameo	0	3.19	1.52	0	27	1	24	Noun	NN	21838
camera	0	5	0	0	30	1	2907	Noun	NN	844740
cameraman	0	4.63	0.97	1	28	0.96	110	Noun	NN	13139
campaigner	0	3.52	1.5	0	25	1	8	Noun	NN	57160
camper	0	4.63	0.69	0	27	1	73	Noun	NN	32468
campfire	0	4.79	0.49	0	29	1	64	Noun	NN	11939
campground	0	4.7	0.91	0	27	1	9	Noun	NN	17818
camping	0	4	1.04	0	27	1	315	Noun	NN	52857
campsite	0	4.55	1.02	0	29	1	30	Noun	NN	39335
campus	0	4.64	0.68	0	28	1	546	Noun	NN	314963
canal	0	4.68	0.69	0	25	1	326	Noun	NN	117639
cancellation	0	2.1	1.26	0	29	1	65	Noun	NN	59883
cancer	0	3.86	1.48	1	30	0.97	1139	Noun	NN	709323
candidacy	0	2.39	1.13	0	28	1	32	Noun	NN	16302
candidate	0	3.81	1.36	0	27	1	434	Noun	NN	716013
candle	0	4.86	0.45	0	28	1	409	Noun	NN	83461
candy	0	4.83	0.76	0	29	1	1825	Noun	NN	67126
canister	0	4.93	0.26	0	28	1	73	Noun	NN	15496
cannabis	0	4.69	0.81	0	29	1	23	Noun	NN	67508
cannon	0	4.79	0.68	0	29	1	444	Noun	NN	43714
canon	0	4.56	1.05	0	27	1	50	Noun	NN	56731
canopy	0	4.52	0.75	0	27	1	86	Noun	NN	44434
canteen	0	4.88	0.33	0	26	1	87	Noun	NN	15644
canvas	0	4.78	0.7	0	27	1	216	Noun	NN	78636
canyon	0	4.81	0.79	0	27	1	418	Noun	NN	29293
capability	0	1.93	1.02	0	28	1	70	Noun	NN	365110
capacitor	0	3.96	1.3	4	28	0.86	14	Noun	NN	32834
capacity	0	3.1	1.54	0	30	1	413	Noun	NN	589986
capital	0	4.1	1.11	0	29	1	648	Noun	NN	720344
capitalism	0	1.96	1.13	0	27	1	51	Noun	NN	154716
capsule	0	4.52	0.95	0	29	1	130	Noun	NN	46235
captivity	0	2.76	1.33	0	29	1	64	Noun	NN	26959
captor	0	2.9	1.47	0	30	1	15	Noun	NN	10310
car	0	4.89	0.31	0	28	1	24636	Noun	NN	2853424
caramel	0	4.73	0.64	0	30	1	63	Noun	NN	17001
carbohydrate	0	3.59	1.43	0	29	1	4	Noun	NN	46167
carbon	0	4.22	1.34	1	28	0.96	267	Noun	NN	365719
carcass	0	4.46	1.17	0	28	1	79	Noun	NN	22120
carcinogen	0	3.34	1.34	0	29	1	6	Noun	NN	10313
card	0	4.9	0.56	0	29	1	4357	Noun	NN	1252691
cardiologist	0	4.48	0.91	0	29	1	36	Noun	NN	10003
career	0	2.54	1.14	1	27	0.96	2305	Noun	NN	1006646
caregiver	0	4.18	1.22	0	28	1	16	Noun	NN	37154
caretaker	0	4.24	1.06	0	29	1	125	Noun	NN	21480
cargo	0	4.62	0.73	0	29	1	459	Noun	NN	76545
carnage	0	3.48	1.48	0	27	1	57	Noun	NN	17811
carnival	0	4.68	0.85	0	25	1	363	Noun	NN	29028
carriage	0	4.86	0.36	1	29	0.97	381	Noun	NN	80917
carrier	0	4.2	1.15	3	28	0.89	326	Noun	NN	205877
carrot	0	5	0	0	30	1	195	Noun	NN	62326
cartel	0	3.3	1.51	0	27	1	65	Noun	NN	29532
cartilage	0	4.71	0.66	0	28	1	37	Noun	NN	19840
carton	0	5	0	0	29	1	96	Noun	NN	16357
cartoon	0	4.33	0.92	0	27	1	192	Noun	NN	104523
cartoonist	0	3.93	1.38	0	27	1	17	Noun	NN	17398
cartridge	0	4.78	0.51	1	28	0.96	49	Noun	NN	59171
case	0	3.93	1.28	1	30	0.97	14403	Noun	NN	4849558
casing	0	4.28	1.33	1	30	0.97	96	Noun	NN	24356
casino	0	4.77	0.51	0	26	1	1039	Noun	NN	81266
casket	0	4.86	0.45	0	28	1	162	Noun	NN	11376
casserole	0	4.87	0.35	0	30	1	85	Noun	NN	11864
cassette	0	4.6	1.12	0	25	1	93	Noun	NN	35812
caste	0	2.67	1.46	3	24	0.88	44	Noun	NN	32268
castle	0	4.96	0.19	0	28	1	1099	Noun	NN	157758
casualty	0	2.85	1.51	0	27	1	138	Noun	NN	92779
cat	0	4.86	0.52	0	29	1	3383	Noun	NN	442591
catalog	0	4.68	0.72	0	28	1	149	Noun	NN	74663
catalyst	0	2.85	1.26	0	27	1	40	Noun	NN	49295
cataract	0	4.38	1.12	0	29	1	6	Noun	NN	14516
catastrophe	0	2.96	1.43	0	27	1	126	Noun	NN	50750
catcher	0	4.44	0.93	0	27	1	191	Noun	NN	20965
catechism	0	2.57	1.47	4	27	0.85	15	Noun	NN	10311
category	0	2.82	1.52	0	28	1	207	Noun	NN	608347
caterer	0	4.37	1	0	30	1	106	Noun	NN	10173
catering	0	3.81	1.21	0	27	1	138	Noun	NN	61163
caterpillar	0	4.87	0.43	0	30	1	57	Noun	NN	19151
catfish	0	4.85	0.77	0	27	1	63	Noun	NN	13168
cathedral	0	4.86	0.36	0	28	1	190	Noun	NN	78955
catheter	0	4.48	0.92	1	26	0.96	55	Noun	NN	15278
cattle	0	4.64	0.78	0	28	1	674	Noun	NN	141312
catwalk	0	4.15	1.05	0	26	1	36	Noun	NN	10344
cauliflower	0	5	0	0	24	1	28	Noun	NN	11146
causality	0	2.04	1.27	1	26	0.96	7	Noun	NN	16286
causation	0	1.81	1.14	1	28	0.96	9	Noun	NN	23608
cavalry	0	4.08	1.32	2	28	0.93	317	Noun	NN	43079
caveat	0	2	1.3	3	24	0.88	17	Noun	NN	33392
cavern	0	4.57	0.9	0	30	1	56	Noun	NN	16478
cavity	0	4.5	0.9	0	30	1	152	Noun	NN	50589
ceasefire	0	3.11	1.34	0	28	1	15	Noun	NN	13515
ceiling	0	4.85	0.46	0	27	1	426	Noun	NN	166166
celebration	0	3.47	1.22	0	30	1	504	Noun	NN	225438
celebrity	0	3.28	1.57	0	25	1	372	Noun	NN	155330
celery	0	4.8	0.76	0	30	1	95	Noun	NN	13508
cell	0	4.44	1.12	0	27	1	2772	Noun	NN	1020769
cellar	0	4.68	0.86	0	28	1	478	Noun	NN	42557
cello	0	4.96	0.19	1	29	0.97	95	Noun	NN	17329
cemetery	0	4.93	0.26	0	29	1	443	Noun	NN	78779
censorship	0	1.79	1.11	0	29	1	54	Noun	NN	56810
census	0	3.3	1.37	0	30	1	70	Noun	NN	86286
cent	0	4.19	1.2	0	26	1	483	Noun	NN	725108
centerpiece	0	4.62	0.82	0	29	1	32	Noun	NN	14800
centimeter	0	4.13	1.31	0	30	1	10	Noun	NN	13993
century	0	2.83	1.75	0	29	1	1063	Noun	NN	1370970
cereal	0	4.83	0.76	0	29	1	324	Noun	NN	53065
ceremony	0	3.57	0.96	0	28	1	807	Noun	NN	240900
certainty	0	1.59	1.18	0	29	1	154	Noun	NN	91848
certificate	0	4.59	0.82	0	29	1	458	Noun	NN	288790
certification	0	3.72	1.37	0	25	1	19	Noun	NN	121356
chairman	0	4.31	1.04	0	29	1	605	Noun	NN	230921
chairperson	0	4.58	0.99	2	28	0.93	6	Noun	NN	10415
chalet	0	4.36	1.19	4	29	0.86	26	Noun	NN	14246
challenger	0	2.68	1.35	0	25	1	77	Noun	NN	23434
chamber	0	4.59	0.89	0	27	1	650	Noun	NN	186055
championship	0	3.23	1.38	0	30	1	500	Noun	NN	187229
chance	0	1.64	0.99	1	29	0.97	12303	Noun	NN	1350212
chancellor	0	4.2	1.03	0	30	1	210	Noun	NN	27331
chandelier	0	4.79	0.83	0	28	1	72	Noun	NN	11438
changer	0	3.41	1.28	0	27	1	23	Noun	NN	16553
chaos	0	2.79	1.32	0	29	1	479	Noun	NN	112767
chaplain	0	4.33	1.24	0	30	1	116	Noun	NN	23439
chapter	0	3.43	1.26	0	28	1	604	Noun	NN	542751
character	0	2.93	1.66	0	27	1	1946	Noun	NN	1711621
characterization	0	1.81	1.14	0	31	1	7	Noun	NN	41711
charcoal	0	4.85	0.77	0	27	1	90	Noun	NN	27923
charger	0	4.39	0.92	0	28	1	62	Noun	NN	34695
chariot	0	4.86	0.74	0	29	1	103	Noun	NN	20205
charisma	0	2.07	1.27	0	28	1	50	Noun	NN	16723
charity	0	2.62	1.29	0	29	1	841	Noun	NN	427075
chasm	0	4.24	1.2	3	28	0.89	18	Noun	NN	12689
chastity	0	2	1.36	0	27	1	74	Noun	NN	10274
checklist	0	4.61	0.88	0	28	1	39	Noun	NN	37797
checkout	0	3.96	1.34	0	27	1	64	Noun	NN	29794
checkpoint	0	3.62	1.32	0	29	1	95	Noun	NN	31936
cheek	0	4.83	0.54	0	29	1	365	Noun	NN	91872
cheerleader	0	4.9	0.31	0	29	1	329	Noun	NN	14699
cheese	0	4.7	0.79	0	30	1	1991	Noun	NN	195870
cheesecake	0	4.97	0.19	0	29	1	118	Noun	NN	12325
chef	0	4.3	1.29	0	30	1	606	Noun	NN	123049
chemist	0	4.24	1.27	0	29	1	95	Noun	NN	40502
chemistry	0	3.64	1.39	0	28	1	442	Noun	NN	131419
chemotherapy	0	4.35	0.85	1	27	0.96	59	Noun	NN	46447
chess	0	4.7	0.67	0	27	1	380	Noun	NN	56944
chest	0	4.93	0.27	0	27	1	2090	Noun	NN	195663
chick	0	4.93	0.27	0	27	1	1334	Noun	NN	52887
chicken	0	4.8	0.55	0	30	1	3148	Noun	NN	248689
child	0	4.78	0.58	0	27	1	8040	Noun	NN	5227249
childbirth	0	4.04	1.24	0	25	1	78	Noun	NN	21450
childhood	0	2.53	1.36	0	30	1	723	Noun	NN	222485
chili	0	4.79	0.49	0	29	1	382	Noun	NN	17919
chimney	0	5	0	0	27	1	213	Noun	NN	46445
chimp	0	4.96	0.2	1	26	0.96	153	Noun	NN	13288
chimpanzee	0	4.96	0.19	0	28	1	62	Noun	NN	17013
chin	0	4.89	0.32	0	27	1	647	Noun	NN	51157
chiropractor	0	4.86	0.35	0	29	1	45	Noun	NN	12898
chloride	0	3.74	1.48	1	28	0.96	46	Noun	NN	18767
chlorine	0	4.5	0.96	0	28	1	38	Noun	NN	21647
choice	0	1.9	1.14	0	29	1	4975	Noun	NN	1471587
choir	0	4.34	1.14	0	29	1	271	Noun	NN	72380
cholera	0	3.26	1.51	1	28	0.96	56	Noun	NN	15834
cholesterol	0	3.4	1.4	0	30	1	95	Noun	NN	59901
chopper	0	4.07	1.03	0	29	1	596	Noun	NN	10993
chord	0	4.29	0.9	0	28	1	93	Noun	NN	61597
chore	0	3.78	0.95	1	24	0.96	51	Noun	NN	40455
choreographer	0	4.23	1.24	1	27	0.96	53	Noun	NN	19836
choreography	0	3.22	1.6	0	27	1	45	Noun	NN	19985
chorus	0	4.03	1.02	0	29	1	310	Noun	NN	73410
chromium	0	4.33	1.18	3	30	0.9	33	Noun	NN	11818
chromosome	0	4.11	1.42	0	27	1	38	Noun	NN	43675
chronology	0	2.29	1.38	0	28	1	10	Noun	NN	24407
chunk	0	3.86	1.41	0	28	1	211	Noun	NN	91841
church	0	4.9	0.41	0	29	1	3553	Noun	NN	1322436
churchyard	0	4.93	0.26	0	29	1	16	Noun	NN	19435
chute	0	4.61	0.79	0	28	1	184	Noun	NN	11894
cider	0	4.97	0.19	0	29	1	97	Noun	NN	30041
cigar	0	4.93	0.27	0	27	1	660	Noun	NN	29734
cigarette	0	4.88	0.43	0	26	1	1357	Noun	NN	131537
cinema	0	4.69	0.66	0	29	1	198	Noun	NN	179092
cinematography	0	3.52	1.29	0	25	1	22	Noun	NN	12683
cinnamon	0	4.85	0.46	0	26	1	152	Noun	NN	28540
circuit	0	3.83	1.29	0	30	1	340	Noun	NN	256441
circuitry	0	3.85	1.29	3	29	0.9	44	Noun	NN	14907
circulation	0	3.03	1.43	0	30	1	185	Noun	NN	100443
circumcision	0	4.13	1.17	0	30	1	34	Noun	NN	21608
circumference	0	3.96	1.27	0	25	1	38	Noun	NN	16711
circumstance	0	1.77	0.97	0	30	1	105	Noun	NN	639346
circus	0	4.43	0.73	0	30	1	870	Noun	NN	45089
citation	0	3.66	1.14	0	29	1	81	Noun	NN	87196
citizen	0	4.43	1.01	0	30	1	680	Noun	NN	655050
citizenry	0	2.65	1.5	2	28	0.93	19	Noun	NN	13624
citizenship	0	2.96	1.53	0	27	1	68	Noun	NN	93380
city	0	4.79	0.57	1	29	0.97	8624	Noun	NN	2182009
civility	0	1.62	0.86	0	29	1	28	Noun	NN	11398
civilization	0	3.32	1.52	0	28	1	425	Noun	NN	136216
clan	0	3.46	1.6	1	29	0.97	209	Noun	NN	53334
clarification	0	1.93	1.18	0	28	1	30	Noun	NN	61502
clarinet	0	4.92	0.27	0	26	1	80	Noun	NN	13705
clarity	0	2	1.1	0	29	1	107	Noun	NN	119485
class	0	3.85	1.32	0	27	1	5985	Noun	NN	2067493
classification	0	2.52	1.57	0	29	1	37	Noun	NN	117237
classmate	0	4.32	0.86	0	28	1	78	Noun	NN	43035
classroom	0	4.76	0.51	0	29	1	227	Noun	NN	299576
clause	0	2.73	1.48	0	26	1	143	Noun	NN	198952
clay	0	4.93	0.26	0	29	1	612	Noun	NN	94610
cleaner	0	3.78	1.15	0	27	1	353	Noun	NN	71524
cleanliness	0	2.63	1.28	1	28	0.96	31	Noun	NN	23590
cleansing	0	2.75	1.35	0	28	1	52	Noun	NN	31703
cleanup	0	3.04	1.59	0	26	1	100	Noun	NN	26106
clearance	0	2.19	1.36	0	27	1	350	Noun	NN	81903
cleavage	0	4.64	0.57	0	25	1	70	Noun	NN	11877
clergy	0	4.03	1.3	1	30	0.97	48	Noun	NN	62123
clergyman	0	4.73	0.52	0	30	1	17	Noun	NN	17134
cleric	0	4.39	0.89	2	25	0.92	68	Noun	NN	23328
clerk	0	4.28	1.28	0	25	1	658	Noun	NN	89028
cliche	0	2.33	1.32	0	30	1	41	Noun	NN	14330
client	0	3.9	1.27	0	30	1	2715	Noun	NN	1288547
clientele	0	3.31	1.39	0	29	1	80	Noun	NN	17413
climate	0	3.5	1.48	0	28	1	180	Noun	NN	771992
climber	0	4.5	0.75	0	28	1	40	Noun	NN	27791
clinic	0	4.24	1.06	0	29	1	714	Noun	NN	176854
clinician	0	4.12	1.12	4	28	0.86	3	Noun	NN	51024
clipboard	0	4.93	0.27	0	27	1	38	Noun	NN	12147
clipper	0	4.3	1.03	1	28	0.96	59	Noun	NN	10370
clique	0	2.68	1.52	0	28	1	39	Noun	NN	13646
cloakroom	0	4.48	1.24	4	27	0.85	33	Noun	NN	10013
clone	0	4.34	0.86	0	29	1	128	Noun	NN	53913
closeness	0	2.39	1.34	0	28	1	36	Noun	NN	14720
closure	0	1.78	1.28	0	27	1	158	Noun	NN	143720
cloth	0	4.9	0.31	0	29	1	311	Noun	NN	117946
clothes	0	4.76	0.69	0	29	1	5158	Noun	NN	295342
clothing	0	4.43	1.1	0	28	1	553	Noun	NN	219662
clove	0	4.42	0.86	1	27	0.96	26	Noun	NN	13530
clover	0	4.69	0.84	0	26	1	67	Noun	NN	11487
club	0	3.78	1.45	0	27	1	5038	Noun	NN	1024712
clubhouse	0	4.61	0.83	0	28	1	82	Noun	NN	17626
clue	0	2.93	1.56	0	28	1	898	Noun	NN	174049
coal	0	4.66	0.86	0	29	1	335	Noun	NN	239579
coalition	0	2.75	1.43	2	30	0.93	92	Noun	NN	174452
coast	0	4.21	1.1	0	28	1	1361	Noun	NN	305103
coaster	0	4.68	0.63	0	25	1	159	Noun	NN	24220
coastline	0	4.54	0.9	1	27	0.96	36	Noun	NN	44846
coating	0	3.97	1.1	0	30	1	23	Noun	NN	57414
cocaine	0	4.52	0.96	0	25	1	421	Noun	NN	50334
cockpit	0	4.27	1.34	0	26	1	164	Noun	NN	28019
cockroach	0	4.96	0.19	0	27	1	174	Noun	NN	13838
cocktail	0	4.4	0.89	0	30	1	555	Noun	NN	80147
cocoa	0	4.89	0.42	1	29	0.97	256	Noun	NN	25450
cod	0	4.61	1.1	0	28	1	114	Noun	NN	20740
coder	0	3.42	1.53	2	26	0.92	6	Noun	NN	11696
coefficient	0	1.85	1.08	3	29	0.9	8	Noun	NN	39962
coercion	0	1.71	0.91	0	24	1	22	Noun	NN	25968
coffee	0	4.81	0.79	1	28	0.96	7371	Noun	NN	431068
coffer	0	3.8	1.32	4	29	0.86	5	Noun	NN	15750
coffin	0	4.86	0.58	0	29	1	461	Noun	NN	41576
cognition	0	1.79	1.17	1	29	0.97	1	Noun	NN	32617
coherence	0	2.62	1.29	0	29	1	9	Noun	NN	26440
cohesion	0	2.16	0.9	4	29	0.86	5	Noun	NN	30339
cohort	0	2.75	1.39	3	27	0.89	10	Noun	NN	62382
coincidence	0	1.57	0.88	0	28	1	948	Noun	NN	74615
collaboration	0	2.59	1.37	0	27	1	58	Noun	NN	282527
collaborator	0	3.46	1.44	0	24	1	32	Noun	NN	43661
collage	0	4.6	0.67	0	30	1	37	Noun	NN	25093
collagen	0	3.67	1.27	1	31	0.97	39	Noun	NN	14278
colleague	0	3.79	1.32	0	29	1	346	Noun	NN	455637
collection	0	4.04	1.13	0	27	1	926	Noun	NN	1023278
collector	0	4.1	1.14	0	29	1	220	Noun	NN	113242
college	0	4.62	0.82	0	29	1	4344	Noun	NN	801371
collie	0	4.77	0.82	1	27	0.96	53	Noun	NN	13436
collision	0	3.61	1.47	0	28	1	137	Noun	NN	83810
colon	0	4.66	0.9	0	29	1	129	Noun	NN	35515
colonel	0	3.89	1.26	1	29	0.97	4909	Noun	NN	18870
colonialism	0	1.85	1.17	1	28	0.96	17	Noun	NN	19547
colonist	0	3.8	1.45	0	30	1	3	Noun	NN	18336
colonization	0	2.69	1.26	0	29	1	12	Noun	NN	16665
colony	0	3.77	1.11	0	26	1	302	Noun	NN	167292
coloring	0	3.59	1.19	0	27	1	92	Noun	NN	20964
column	0	4.48	0.7	0	27	1	559	Noun	NN	409932
columnist	0	4.14	1.35	1	29	0.97	51	Noun	NN	47730
coma	0	3.69	1.44	0	29	1	626	Noun	NN	21166
combination	0	2.86	1.24	0	28	1	611	Noun	NN	502779
combo	0	3.37	1.42	0	27	1	125	Noun	NN	41035
combustion	0	3.86	1.21	1	29	0.97	64	Noun	NN	35073
comeback	0	2.23	1.25	0	30	1	170	Noun	NN	37283
comedian	0	4.04	1.25	0	26	1	209	Noun	NN	53750
comedy	0	3.1	1.26	0	29	1	602	Noun	NN	223250
comet	0	4.67	1.03	0	30	1	157	Noun	NN	59324
comma	0	4.65	0.57	0	23	1	50	Noun	NN	25386
commander	0	4.31	1	0	29	1	1887	Noun	NN	121119
commandment	0	2.53	1.14	0	30	1	83	Noun	NN	66596
commando	0	3.9	1.29	0	29	1	54	Noun	NN	15677
commemoration	0	2.6	1.44	2	27	0.93	5	Noun	NN	17227
commencement	0	3.18	1.44	1	29	0.97	15	Noun	NN	37958
commentary	0	2.96	1.61	0	26	1	76	Noun	NN	182036
commentator	0	4.15	1.06	0	27	1	139	Noun	NN	92865
commerce	0	2.76	1.35	1	30	0.97	177	Noun	NN	78503
commissioner	0	3.64	1.55	0	25	1	624	Noun	NN	104935
commitment	0	1.74	1.13	0	27	1	550	Noun	NN	528947
committee	0	4.14	0.99	0	29	1	1123	Noun	NN	649117
commodity	0	2.91	1.59	0	23	1	84	Noun	NN	139698
commonality	0	1.74	1.12	1	32	0.97	6	Noun	NN	13911
commonwealth	0	3.38	1.35	0	29	1	340	Noun	NN	20209
commotion	0	2.71	1.38	0	28	1	106	Noun	NN	10371
communication	0	2.9	1.54	0	29	1	528	Noun	NN	804799
communicator	0	3.21	1.53	1	25	0.96	36	Noun	NN	23091
communion	0	3.39	1.45	0	28	1	106	Noun	NN	64308
communism	0	1.86	1.3	0	29	1	107	Noun	NN	61352
community	0	3.52	1.37	0	27	1	1486	Noun	NN	2932353
commuter	0	3.03	1.27	0	29	1	30	Noun	NN	40295
companionship	0	2.45	1.27	0	29	1	96	Noun	NN	14753
company	0	4.11	1.15	0	27	1	7507	Noun	NN	4219868
comparison	0	2	1.05	1	29	0.97	187	Noun	NN	423060
compartment	0	3.57	1.4	0	28	1	304	Noun	NN	51757
compassion	0	1.89	1.01	0	27	1	319	Noun	NN	95985
compatibility	0	1.94	1.11	0	32	1	23	Noun	NN	57353
compatriot	0	3.24	1.36	2	27	0.93	4	Noun	NN	12435
compensation	0	3.25	1.42	1	25	0.96	109	Noun	NN	245291
competence	0	1.78	0.97	0	27	1	45	Noun	NN	75525
competency	0	1.81	0.94	1	27	0.96	12	Noun	NN	46741
competition	0	3.86	1.22	0	29	1	1066	Noun	NN	686798
competitiveness	0	2.14	1.24	0	28	1	7	Noun	NN	36440
competitor	0	3.23	1.36	0	30	1	70	Noun	NN	185271
compilation	0	2.81	1.39	1	27	0.96	14	Noun	NN	62553
compiler	0	2.46	1.53	1	25	0.96	7	Noun	NN	64299
complacency	0	1.59	0.84	3	30	0.9	14	Noun	NN	17859
complaint	0	2.69	1.37	0	29	1	518	Noun	NN	505548
completeness	0	2.2	1.3	0	30	1	7	Noun	NN	19812
completion	0	2.33	1.24	0	27	1	79	Noun	NN	198078
complexion	0	3.36	1.22	0	28	1	98	Noun	NN	16881
complexity	0	1.87	1.25	0	30	1	41	Noun	NN	203716
compliance	0	1.96	1.22	0	27	1	50	Noun	NN	194787
complication	0	1.86	1.08	0	28	1	71	Noun	NN	99798
complicity	0	1.7	1.03	1	28	0.96	21	Noun	NN	16899
component	0	3.04	1.37	0	27	1	81	Noun	NN	607752
composer	0	4.37	0.93	0	27	1	127	Noun	NN	130418
composition	0	3.1	1.59	0	29	1	124	Noun	NN	213639
composure	0	2.43	1.5	0	28	1	15	Noun	NN	12299
comprehension	0	1.78	0.85	0	27	1	55	Noun	NN	44599
compression	0	3.07	1.44	0	28	1	63	Noun	NN	70596
compressor	0	4.39	0.96	0	28	1	25	Noun	NN	24677
compulsion	0	1.79	1.26	0	28	1	63	Noun	NN	23279
computation	0	2.92	1.32	1	27	0.96	4	Noun	NN	48812
computer	0	4.93	0.26	0	28	1	3011	Noun	NN	1387323
computing	0	3.25	1.53	0	28	1	22	Noun	NN	126016
comrade	0	3.69	1.34	0	29	1	436	Noun	NN	78205
conceit	0	2.1	1.16	0	30	1	24	Noun	NN	12482
concentration	0	2.1	1.08	0	31	1	282	Noun	NN	279460
concept	0	1.41	0.64	0	27	1	553	Noun	NN	886165
conception	0	2.24	1.46	0	29	1	106	Noun	NN	120535
concert	0	4.35	0.8	0	26	1	895	Noun	NN	245194
concerto	0	3.75	0.89	2	30	0.93	48	Noun	NN	14303
concession	0	2.71	1.58	0	28	1	69	Noun	NN	78583
concierge	0	3.89	1.4	2	30	0.93	73	Noun	NN	11062
conclusion	0	2.11	1.1	0	28	1	465	Noun	NN	558355
concoction	0	3.5	1.31	0	30	1	20	Noun	NN	10948
concussion	0	3.19	1.47	0	27	1	229	Noun	NN	15741
condemnation	0	2.04	1.23	0	28	1	24	Noun	NN	41074
condensation	0	4.24	1.06	0	29	1	17	Noun	NN	20621
condenser	0	3.96	1.28	1	27	0.96	7	Noun	NN	11564
condition	0	2.15	1.23	0	27	1	1936	Noun	NN	1849890
conditioner	0	4.21	1.05	0	29	1	110	Noun	NN	22850
conditioning	0	2.25	0.89	0	28	1	196	Noun	NN	76118
condo	0	4.76	0.69	0	29	1	215	Noun	NN	24168
condolence	0	2.19	1.08	1	28	0.96	17	Noun	NN	19586
condom	0	4.87	0.43	0	30	1	263	Noun	NN	45289
condominium	0	4.35	1.02	2	28	0.93	17	Noun	NN	10152
conductivity	0	2.67	1.21	0	27	1	3	Noun	NN	10761
conductor	0	4.26	0.9	0	27	1	155	Noun	NN	57164
conduit	0	3.58	1.24	1	27	0.96	53	Noun	NN	22598
cone	0	4.86	0.59	0	28	1	149	Noun	NN	55748
confederacy	0	2.79	1.63	0	29	1	25	Noun	NN	12110
conference	0	3.86	1.27	0	29	1	1296	Noun	NN	849905
confession	0	2.4	1.33	0	30	1	841	Noun	NN	75350
confidence	0	2.17	1.12	0	30	1	993	Noun	NN	474681
confidentiality	0	2.47	1.57	0	30	1	95	Noun	NN	48442
configuration	0	2.54	1.45	0	26	1	48	Noun	NN	193647
confinement	0	3.61	1.34	1	29	0.97	40	Noun	NN	28044
confirmation	0	2.39	1.2	0	28	1	280	Noun	NN	113463
confiscation	0	2.9	1.47	2	32	0.94	2	Noun	NN	14264
confluence	0	2.22	1.48	4	27	0.85	10	Noun	NN	12518
conformity	0	1.79	1.18	0	29	1	19	Noun	NN	28115
confrontation	0	2.53	1.31	0	30	1	98	Noun	NN	59889
confusion	0	2.24	1.41	0	29	1	363	Noun	NN	203620
congestion	0	3.61	1.27	1	24	0.96	24	Noun	NN	61784
conglomerate	0	2.52	1.4	2	29	0.93	39	Noun	NN	15993
congrats	0	2.12	1.45	1	27	0.96	91	Noun	NN	24937
congratulation	0	2.27	1.23	0	30	1	25	Noun	NN	91149
congregation	0	4.15	1.1	0	27	1	117	Noun	NN	113153
congress	0	3.9	1.35	0	30	1	419	Noun	NN	48762
congressman	0	4.58	1.03	0	26	1	325	Noun	NN	25582
conjunction	0	2.15	1.35	0	26	1	66	Noun	NN	133961
connection	0	3	1.39	0	28	1	1386	Noun	NN	861807
connectivity	0	2.33	1.33	0	27	1	6	Noun	NN	64088
connector	0	4.18	1.12	0	28	1	8	Noun	NN	71474
connotation	0	2.07	1.07	0	27	1	14	Noun	NN	25793
conqueror	0	3.54	1.5	0	28	1	57	Noun	NN	13179
conquest	0	2.54	1.2	0	28	1	96	Noun	NN	44322
conscience	0	1.96	1.1	1	26	0.96	709	Noun	NN	109417
consciousness	0	2.32	1.35	0	31	1	413	Noun	NN	239958
consecration	0	2.07	1.39	0	30	1	2	Noun	NN	10448
consensus	0	2.32	1.25	0	28	1	83	Noun	NN	148790
consequence	0	2.64	1.52	0	28	1	160	Noun	NN	538243
conservation	0	2.41	1.39	0	27	1	32	Noun	NN	208831
conservationist	0	3.17	1.44	0	29	1	3	Noun	NN	11300
conservatism	0	1.89	1.03	2	30	0.93	1	Noun	NN	24443
consideration	0	1.86	1.27	0	28	1	334	Noun	NN	483146
consignment	0	2.63	1.28	1	28	0.96	29	Noun	NN	11834
consistency	0	2.55	1.18	0	29	1	39	Noun	NN	105338
consolation	0	2.14	1.15	0	28	1	186	Noun	NN	29289
consolidation	0	2.79	1.38	0	24	1	10	Noun	NN	65373
consonant	0	3.21	1.52	2	30	0.93	10	Noun	NN	15064
consortium	0	2.52	1.5	3	24	0.88	35	Noun	NN	47139
conspiracy	0	1.76	1.16	0	25	1	526	Noun	NN	142758
conspirator	0	2.37	1.62	0	27	1	11	Noun	NN	11194
constable	0	4.54	0.95	2	28	0.93	144	Noun	NN	26124
constellation	0	4.31	1	1	30	0.97	48	Noun	NN	31909
constipation	0	3.36	1.39	1	29	0.97	21	Noun	NN	15842
constituency	0	2.56	1.48	1	28	0.96	22	Noun	NN	108300
constitution	0	3.23	1.68	0	30	1	282	Noun	NN	151579
constitutionality	0	1.7	1.17	1	28	0.96	6	Noun	NN	10914
constraint	0	2.93	1.27	0	28	1	2	Noun	NN	154600
construction	0	3.72	1.44	0	29	1	706	Noun	NN	660520
constructor	0	3.86	1.15	1	29	0.97	2	Noun	NN	26036
consul	0	3.36	1.35	3	28	0.89	184	Noun	NN	10703
consulate	0	3.6	1.35	4	29	0.86	249	Noun	NN	17271
consultant	0	3.97	1.33	0	30	1	187	Noun	NN	257200
consultation	0	2.19	1.08	0	27	1	64	Noun	NN	365309
consumer	0	3.57	1.45	0	30	1	106	Noun	NN	774132
consumerism	0	2.08	1.38	1	25	0.96	9	Noun	NN	14696
consumption	0	3.16	1.4	0	25	1	94	Noun	NN	286365
container	0	4.85	0.36	0	27	1	219	Noun	NN	188593
containment	0	3.33	1.39	0	27	1	107	Noun	NN	22269
contaminant	0	3.62	1.47	0	29	1	3	Noun	NN	26029
contamination	0	2.7	1.38	0	27	1	60	Noun	NN	67477
contemplation	0	1.83	1.17	0	29	1	12	Noun	NN	24469
contempt	0	1.82	1.25	0	28	1	256	Noun	NN	65297
contender	0	3	1.22	1	29	0.97	49	Noun	NN	48215
contention	0	1.75	1.17	2	30	0.93	41	Noun	NN	63436
contentment	0	2.25	1.29	0	28	1	21	Noun	NN	12405
contestant	0	4.17	1	0	29	1	136	Noun	NN	38608
context	0	2.17	1.29	0	30	1	163	Noun	NN	774915
continent	0	4.34	1.26	1	30	0.97	187	Noun	NN	139829
contingency	0	2.03	1.21	0	29	1	78	Noun	NN	40547
continuance	0	2.12	1.27	3	28	0.89	57	Noun	NN	11073
continuation	0	2.36	1.16	1	29	0.97	24	Noun	NN	60766
continuity	0	2.03	1.02	0	29	1	35	Noun	NN	82461
continuum	0	2.36	1.25	0	28	1	77	Noun	NN	32252
contraception	0	3.29	1.33	0	28	1	23	Noun	NN	31707
contraction	0	3.53	1.5	0	30	1	55	Noun	NN	44053
contractor	0	4.2	1.16	0	30	1	160	Noun	NN	243790
contradiction	0	2.11	1.22	0	27	1	75	Noun	NN	94891
contribution	0	2.41	1.21	0	29	1	223	Noun	NN	630095
contributor	0	3.6	1.19	1	26	0.96	18	Noun	NN	135249
controller	0	4.33	1.04	0	27	1	66	Noun	NN	136497
controversy	0	2.29	1.33	0	24	1	83	Noun	NN	149243
conundrum	0	1.93	1.14	2	29	0.93	25	Noun	NN	14861
convection	0	2.74	1.35	2	29	0.93	4	Noun	NN	11135
convenience	0	2.04	1.1	0	28	1	245	Noun	NN	121911
convent	0	3.96	1.51	1	26	0.96	170	Noun	NN	19444
convention	0	3.28	1.39	1	30	0.97	629	Noun	NN	275106
convergence	0	2.2	1.19	2	27	0.93	12	Noun	NN	39628
conversation	0	3.28	1.41	0	29	1	2543	Noun	NN	574894
conversion	0	2.46	1.14	0	28	1	66	Noun	NN	235078
converter	0	3.61	1.29	2	30	0.93	11	Noun	NN	34146
conveyance	0	2.85	1.7	1	28	0.96	11	Noun	NN	12856
conveyor	0	4.22	1.09	0	27	1	43	Noun	NN	15861
conviction	0	2.07	1.25	0	28	1	303	Noun	NN	195658
convoy	0	3.54	1.4	0	28	1	181	Noun	NN	35009
cookbook	0	4.9	0.31	0	30	1	37	Noun	NN	29680
cooker	0	4.22	0.97	0	27	1	34	Noun	NN	38224
cookie	0	5	0	0	27	1	852	Noun	NN	179572
coolant	0	4.25	0.93	0	28	1	35	Noun	NN	20914
cooler	0	4.14	1.15	0	28	1	360	Noun	NN	33843
cooperation	0	2.03	1.13	0	30	1	407	Noun	NN	163308
coordination	0	2.86	1.13	0	29	1	60	Noun	NN	72575
coordinator	0	3.52	1.33	0	29	1	81	Noun	NN	68058
copper	0	4.52	0.8	0	27	1	336	Noun	NN	124175
cord	0	4.63	0.88	0	27	1	358	Noun	NN	86580
corn	0	4.96	0.19	1	28	0.96	725	Noun	NN	162399
cornerstone	0	4.04	1.34	0	27	1	34	Noun	NN	26431
coronation	0	3.23	1.31	4	30	0.87	107	Noun	NN	13421
coroner	0	4.34	1.23	1	30	0.97	458	Noun	NN	23975
corporation	0	2.79	1.47	0	28	1	393	Noun	NN	306830
corps	0	3.43	1.37	1	29	0.97	555	Noun	NN	56043
corpse	0	4.89	0.42	0	28	1	515	Noun	NN	34093
correction	0	3	1.41	0	26	1	163	Noun	NN	128033
correctness	0	2.36	1.13	0	28	1	12	Noun	NN	33395
correlation	0	2.04	1.29	0	28	1	29	Noun	NN	105598
correspondence	0	3.35	1.55	0	26	1	115	Noun	NN	130654
correspondent	0	3.44	1.31	1	28	0.96	110	Noun	NN	65401
corridor	0	4.72	0.8	0	29	1	284	Noun	NN	97980
corrosion	0	4.26	1.05	2	25	0.92	10	Noun	NN	26728
corruption	0	2.39	1.45	0	28	1	218	Noun	NN	178091
cortex	0	3.79	1.2	2	30	0.93	57	Noun	NN	23954
cosmology	0	2.52	1.64	3	28	0.89	6	Noun	NN	17970
cosmos	0	3.19	1.69	0	27	1	153	Noun	NN	23995
cot	0	4.67	0.68	0	27	1	102	Noun	NN	24100
cottage	0	4.85	0.36	0	27	1	270	Noun	NN	154933
cotton	0	4.97	0.19	0	29	1	723	Noun	NN	112625
council	0	2.73	1.48	0	26	1	863	Noun	NN	826534
councilor	0	3.78	1.15	2	29	0.93	9	Noun	NN	16448
counseling	0	2.85	1.41	0	27	1	211	Noun	NN	62563
counselor	0	4.24	0.95	0	29	1	506	Noun	NN	65517
countdown	0	3.3	1.2	0	27	1	180	Noun	NN	15801
counterpart	0	2.63	1.39	0	27	1	25	Noun	NN	111758
counterpoint	0	2.38	1.37	0	29	1	20	Noun	NN	13360
country	0	4.17	1.18	0	30	1	8254	Noun	NN	3899083
countryman	0	3.66	1.26	0	29	1	12	Noun	NN	19485
countryside	0	4.48	0.94	0	27	1	180	Noun	NN	149164
county	0	4.04	1.1	0	28	1	1722	Noun	NN	457497
coupe	0	3.17	1.71	0	29	1	31	Noun	NN	15316
coupling	0	3.29	1.21	1	29	0.97	26	Noun	NN	26800
coupon	0	4.79	0.49	0	29	1	111	Noun	NN	60644
courage	0	1.52	0.99	0	29	1	1207	Noun	NN	154530
courier	0	4.58	0.76	1	27	0.96	168	Noun	NN	27865
court	0	4.31	1.19	0	26	1	5137	Noun	NN	1506741
courtesy	0	1.77	1.14	0	30	1	414	Noun	NN	104369
courthouse	0	4.86	0.35	0	29	1	225	Noun	NN	17179
courtroom	0	4.63	0.74	0	27	1	427	Noun	NN	30308
courtship	0	2.52	1.23	0	25	1	59	Noun	NN	11214
courtyard	0	4.57	0.94	0	30	1	109	Noun	NN	51643
cousin	0	3.7	1.49	1	28	0.96	2491	Noun	NN	131336
covenant	0	2.69	1.44	1	27	0.96	341	Noun	NN	76264
coverage	0	2.7	1.18	0	30	1	318	Noun	NN	407680
cow	0	4.96	0.19	0	28	1	1301	Noun	NN	152859
coward	0	2.93	1.28	0	30	1	734	Noun	NN	24210
cowardice	0	2.1	1.06	0	30	1	91	Noun	NN	11423
cowboy	0	4.72	0.74	0	25	1	968	Noun	NN	35711
coworker	0	4.28	1.03	0	29	1	34	Noun	NN	19491
coyote	0	4.96	0.19	0	28	1	185	Noun	NN	12208
crackdown	0	2.83	1.42	0	29	1	10	Noun	NN	21559
cracker	0	4.96	0.19	0	27	1	294	Noun	NN	27923
craftsman	0	4	1.13	0	29	1	47	Noun	NN	25529
craftsmanship	0	2.64	1.32	0	25	1	32	Noun	NN	15037
cranberry	0	4.96	0.19	0	27	1	99	Noun	NN	15842
crayon	0	4.87	0.34	0	23	1	21	Noun	NN	11335
cream	0	4.83	0.46	0	30	1	2484	Noun	NN	238187
creation	0	2.15	1.06	0	27	1	310	Noun	NN	506144
creationism	0	1.69	1.05	1	27	0.96	16	Noun	NN	16102
creationist	0	2.46	1.44	3	27	0.89	2	Noun	NN	25079
creativity	0	1.8	1.21	0	30	1	96	Noun	NN	151090
creator	0	3.07	1.51	1	29	0.97	142	Noun	NN	174710
creature	0	4.07	0.98	0	28	1	1092	Noun	NN	257300
credence	0	1.92	1.12	2	27	0.93	21	Noun	NN	14705
credibility	0	2.29	1.61	0	28	1	163	Noun	NN	111084
creditor	0	3.37	1.19	0	30	1	7	Noun	NN	79198
creed	0	2.1	0.98	0	29	1	129	Noun	NN	31699
creek	0	4.87	0.43	0	30	1	454	Noun	NN	37738
cremation	0	3.69	1.47	0	29	1	41	Noun	NN	12784
crest	0	4.52	0.71	1	26	0.96	107	Noun	NN	28392
crevice	0	4.43	1.07	0	30	1	21	Noun	NN	10118
crew	0	4.36	0.73	0	28	1	2424	Noun	NN	344805
cricket	0	4.77	0.68	0	30	1	144	Noun	NN	85789
crime	0	3.03	1.66	0	29	1	3633	Noun	NN	831913
criminality	0	1.87	1.14	0	30	1	6	Noun	NN	14756
crisis	0	2.33	1.45	0	30	1	849	Noun	NN	556466
critic	0	3.55	1.55	0	29	1	192	Noun	NN	286287
criticism	0	2.07	1.33	0	27	1	155	Noun	NN	323902
critter	0	4.19	0.92	1	28	0.96	65	Noun	NN	13897
crocodile	0	4.83	0.64	0	24	1	115	Noun	NN	21190
crossover	0	2.65	1.2	1	27	0.96	20	Noun	NN	31259
crossroad	0	4.41	0.95	1	30	0.97	9	Noun	NN	28190
crucifixion	0	4	1.18	0	27	1	38	Noun	NN	19348
cruelty	0	2.04	1.37	1	26	0.96	166	Noun	NN	54195
cruiser	0	3.78	1.55	0	27	1	162	Noun	NN	27959
crutch	0	4.5	0.92	0	28	1	67	Noun	NN	17252
crux	0	2.69	1.41	1	27	0.96	15	Noun	NN	15628
crypt	0	4.75	0.61	1	25	0.96	70	Noun	NN	11430
cub	0	4.67	0.68	0	27	1	107	Noun	NN	17474
cubicle	0	4.83	0.76	0	29	1	131	Noun	NN	21562
cucumber	0	4.83	0.76	0	29	1	101	Noun	NN	23673
cuisine	0	3.7	1.3	0	27	1	99	Noun	NN	62842
culmination	0	1.96	1	3	29	0.9	21	Noun	NN	23263
culprit	0	3.39	1.1	0	28	1	55	Noun	NN	37512
cult	0	2.71	1.51	0	28	1	227	Noun	NN	112641
cultivation	0	3.13	1.42	0	23	1	8	Noun	NN	46160
culture	0	2.04	1.34	0	27	1	711	Noun	NN	1117440
cunt	0	4.21	1.17	1	29	0.97	350	Noun	NN	16092
cup	0	5	0	0	29	1	2634	Noun	NN	333239
cupboard	0	4.79	0.62	0	29	1	127	Noun	NN	71737
cupcake	0	5	0	0	30	1	167	Noun	NN	29540
curator	0	3.81	1.36	1	27	0.96	47	Noun	NN	52824
curfew	0	2.73	1.44	0	30	1	234	Noun	NN	14211
curiosity	0	1.61	0.96	0	28	1	435	Noun	NN	86534
currency	0	4.25	0.89	0	28	1	186	Noun	NN	228031
curriculum	0	3.23	1.43	0	30	1	70	Noun	NN	258734
cursor	0	4.33	1	0	27	1	3	Noun	NN	36488
curtain	0	4.82	0.48	0	28	1	525	Noun	NN	95246
curvature	0	2.93	1.58	0	29	1	12	Noun	NN	15355
cusp	0	2.74	1.16	1	28	0.96	14	Noun	NN	12378
custard	0	4.85	0.46	1	27	0.96	64	Noun	NN	12729
custodian	0	4.64	0.83	0	28	1	49	Noun	NN	16747
custody	0	3.03	1.4	0	29	1	982	Noun	NN	99519
customer	0	3.82	1.12	0	28	1	775	Noun	NN	1606178
cutback	0	2.88	1.45	2	28	0.93	17	Noun	NN	13286
cutlery	0	4.75	0.52	0	28	1	18	Noun	NN	12346
cutoff	0	3.62	1.57	0	29	1	30	Noun	NN	11723
cutter	0	4.07	1.07	1	30	0.97	239	Noun	NN	34374
cyclist	0	4.84	0.37	0	25	1	5	Noun	NN	111487
cyclone	0	4.48	0.82	0	25	1	24	Noun	NN	13144
cylinder	0	4.64	0.86	0	25	1	80	Noun	NN	97720
cynicism	0	1.78	1.22	2	29	0.93	46	Noun	NN	21586
cyst	0	4.23	1.19	0	30	1	22	Noun	NN	15371
dad	0	4.29	1.12	0	28	1	25870	Noun	NN	248930
daddy	0	4.24	1.33	0	25	1	9439	Noun	NN	33277
dagger	0	4.96	0.19	0	27	1	251	Noun	NN	19176
dairy	0	4.45	0.83	0	29	1	142	Noun	NN	88415
damper	0	3.13	1.41	0	30	1	43	Noun	NN	13889
dancer	0	4.75	0.52	0	28	1	831	Noun	NN	116592
danger	0	2.68	1.22	0	25	1	2227	Noun	NN	425087
darkness	0	3.85	1.35	0	27	1	892	Noun	NN	162275
darts	0	4.83	0.48	0	24	1	100	Noun	NN	14747
dashboard	0	4.61	0.92	0	28	1	50	Noun	NN	38592
data	0	3.93	1.21	0	27	1	1306	Noun	NN	418023
database	0	4	0.93	0	29	1	290	Noun	NN	503564
daughter	0	4.79	0.5	0	28	1	8739	Noun	NN	749709
day	0	3.92	1.38	0	25	1	40893	Noun	NN	8484568
daycare	0	3.93	1.28	1	30	0.97	77	Noun	NN	10911
daylight	0	4.1	1.11	0	29	1	488	Noun	NN	61097
deacon	0	3.52	1.64	2	27	0.93	146	Noun	NN	16030
deadline	0	2.66	1.63	0	29	1	299	Noun	NN	174093
deafness	0	3.48	1.4	0	27	1	14	Noun	NN	11126
dealer	0	3.76	1.2	0	25	1	831	Noun	NN	245230
dealership	0	4.04	1.2	1	29	0.97	66	Noun	NN	33399
death	0	3.73	1.48	0	30	1	11051	Noun	NN	1768427
debacle	0	2.29	1.12	2	26	0.92	34	Noun	NN	23345
debris	0	4.69	0.74	0	26	1	159	Noun	NN	74887
debt	0	2.72	1.36	0	29	1	725	Noun	NN	725919
decade	0	3.19	1.62	0	27	1	247	Noun	NN	773056
deceit	0	2.37	1.13	0	30	1	95	Noun	NN	21120
decency	0	2	1.19	0	25	1	236	Noun	NN	25063
deception	0	1.86	1.03	0	29	1	160	Noun	NN	51676
decision	0	2.19	1.27	0	27	1	2808	Noun	NN	1930260
declaration	0	2.52	1.5	0	29	1	180	Noun	NN	132202
decoder	0	3.56	1.25	1	28	0.96	22	Noun	NN	13221
decomposition	0	3.1	1.27	0	30	1	26	Noun	NN	16325
decor	0	3.77	1.17	0	30	1	52	Noun	NN	35901
decoration	0	3.53	1.43	0	30	1	94	Noun	NN	76351
dedication	0	2.16	1.29	0	31	1	173	Noun	NN	92214
deduction	0	2.19	1.44	0	27	1	87	Noun	NN	67409
deed	0	3.86	1.38	0	28	1	475	Noun	NN	126573
deer	0	4.86	0.59	0	28	1	444	Noun	NN	83078
defamation	0	2.25	1.38	0	28	1	29	Noun	NN	18764
defendant	0	3.8	1.32	0	30	1	904	Noun	NN	254529
defender	0	3.19	1.36	0	26	1	152	Noun	NN	142628
defense	0	2.45	1.43	0	29	1	1665	Noun	NN	369720
deference	0	1.92	1.13	2	28	0.93	19	Noun	NN	16444
defiance	0	2.17	1.18	0	30	1	57	Noun	NN	22744
deficiency	0	2.07	1.33	0	29	1	53	Noun	NN	85554
deficit	0	2.21	1.29	1	29	0.97	55	Noun	NN	213406
definition	0	3.07	1.69	0	27	1	296	Noun	NN	525089
deflation	0	2.63	1.47	0	30	1	3	Noun	NN	20709
deflection	0	3.07	1.39	0	29	1	15	Noun	NN	12195
deforestation	0	3.41	1.47	4	26	0.85	5	Noun	NN	17743
deformation	0	3	1.47	1	29	0.97	3	Noun	NN	14968
deformity	0	3.59	1.39	0	27	1	21	Noun	NN	11148
degeneration	0	2.17	1.34	0	29	1	20	Noun	NN	15734
degradation	0	2.23	1.31	0	26	1	39	Noun	NN	47121
degree	0	3	1.66	0	27	1	759	Noun	NN	1163352
dehydration	0	3.52	1.28	0	27	1	40	Noun	NN	15525
deity	0	2.33	1.57	1	28	0.96	28	Noun	NN	59212
delegation	0	2.7	1.46	0	27	1	70	Noun	NN	77162
deletion	0	2.8	1.61	2	27	0.93	6	Noun	NN	24280
deli	0	4.57	0.84	1	29	0.97	108	Noun	NN	11588
deliberation	0	2.19	1.49	0	31	1	20	Noun	NN	35993
delicacy	0	2.81	1.3	1	27	0.96	71	Noun	NN	19442
deliverance	0	2.34	1.14	0	29	1	30	Noun	NN	15868
delivery	0	3.69	1.12	0	26	1	1017	Noun	NN	555950
delusion	0	2.3	1.59	1	28	0.96	138	Noun	NN	41480
demeanor	0	2.44	1.45	0	27	1	54	Noun	NN	12372
dementia	0	2.23	1.36	0	31	1	66	Noun	NN	75518
demise	0	2.31	1.39	0	29	1	87	Noun	NN	56391
demo	0	3.66	1.32	0	29	1	168	Noun	NN	111770
democracy	0	1.78	1.01	0	27	1	337	Noun	NN	349725
democrat	0	3.96	1.26	0	27	1	86	Noun	NN	92495
demolition	0	3.38	1.17	0	26	1	144	Noun	NN	52097
demon	0	3.32	1.66	0	28	1	1593	Noun	NN	94207
demonstration	0	3.75	1.17	0	28	1	366	Noun	NN	230975
demonstrator	0	4	1.15	0	28	1	8	Noun	NN	38069
den	0	4.57	0.79	0	28	1	312	Noun	NN	32365
denial	0	2.46	1.48	0	28	1	268	Noun	NN	112260
denim	0	4.77	0.63	0	30	1	33	Noun	NN	11897
denomination	0	2.77	1.28	0	30	1	18	Noun	NN	44860
denominator	0	3.36	1.31	0	28	1	28	Noun	NN	17528
density	0	2.52	1.48	0	29	1	73	Noun	NN	153180
dentist	0	4.93	0.26	0	29	1	571	Noun	NN	73112
dentistry	0	3.64	1.5	0	28	1	19	Noun	NN	15031
department	0	3.3	1.44	0	27	1	3256	Noun	NN	729436
departure	0	3.07	1.34	0	30	1	275	Noun	NN	146078
dependence	0	2.15	1.26	0	27	1	21	Noun	NN	65267
dependency	0	1.93	1.01	0	30	1	26	Noun	NN	68401
depiction	0	2.31	1.41	2	28	0.93	16	Noun	NN	46300
depletion	0	2.38	1.1	1	27	0.96	13	Noun	NN	19809
deployment	0	2.9	1.37	0	29	1	64	Noun	NN	105984
deportation	0	2.42	1.33	1	27	0.96	40	Noun	NN	33161
deposition	0	2.92	1.32	2	28	0.93	153	Noun	NN	35313
depositor	0	3.96	1.34	2	28	0.93	5	Noun	NN	12706
depot	0	4.14	1.16	0	29	1	150	Noun	NN	44870
depreciation	0	2	1.33	0	26	1	18	Noun	NN	19881
depression	0	2.39	1.5	0	28	1	406	Noun	NN	240027
deprivation	0	1.96	1.02	0	25	1	40	Noun	NN	44326
depth	0	3.11	1.22	0	27	1	421	Noun	NN	396057
derby	0	4.07	1.41	0	28	1	112	Noun	NN	20239
deregulation	0	2	1.25	2	31	0.94	3	Noun	NN	17665
derivation	0	1.86	1.04	3	25	0.88	13	Noun	NN	15478
descendant	0	3.53	1.53	0	30	1	55	Noun	NN	70875
descent	0	3	1.27	0	27	1	132	Noun	NN	81159
description	0	2.43	1.29	0	28	1	645	Noun	NN	599379
descriptor	0	2.05	1.28	2	23	0.91	1	Noun	NN	24079
designation	0	1.85	1.06	0	27	1	11	Noun	NN	61075
designer	0	3.78	1.28	0	27	1	267	Noun	NN	392058
desirability	0	1.89	0.92	0	28	1	5	Noun	NN	10421
desk	0	4.87	0.51	0	30	1	2239	Noun	NN	233178
desktop	0	4.46	0.99	0	26	1	5	Noun	NN	176571
desperation	0	1.9	0.94	0	29	1	154	Noun	NN	33837
dessert	0	4.93	0.25	0	30	1	715	Noun	NN	73858
destination	0	3.82	1.42	0	28	1	300	Noun	NN	250915
destiny	0	1.67	0.92	0	30	1	1175	Noun	NN	66928
destroyer	0	3.59	1.38	0	29	1	185	Noun	NN	27723
destruction	0	3.21	1.17	0	28	1	587	Noun	NN	259357
detachment	0	2.48	1.24	1	30	0.97	65	Noun	NN	27278
detainee	0	3.76	1.3	1	30	0.97	11	Noun	NN	49521
detection	0	2.57	1.28	0	30	1	85	Noun	NN	123150
detective	0	4.21	0.88	0	28	1	3117	Noun	NN	86982
detector	0	3.7	1.38	1	28	0.96	166	Noun	NN	69253
detention	0	3.26	1.48	0	27	1	333	Noun	NN	96600
detergent	0	4.77	0.82	0	26	1	52	Noun	NN	18273
deterioration	0	2.38	1.45	0	29	1	26	Noun	NN	33782
determination	0	1.7	1.1	0	27	1	142	Noun	NN	202904
deterrence	0	2.08	1.13	3	29	0.9	2	Noun	NN	13808
deterrent	0	2.63	1.31	1	28	0.96	22	Noun	NN	32947
detriment	0	1.77	0.95	2	28	0.93	26	Noun	NN	31923
devaluation	0	2.17	1.24	2	26	0.92	2	Noun	NN	10796
devastation	0	2.76	1.35	0	29	1	49	Noun	NN	27497
developer	0	3.54	1.35	0	24	1	46	Noun	NN	482229
development	0	2.41	1.24	0	29	1	625	Noun	NN	2566495
deviation	0	2.96	1.43	0	27	1	37	Noun	NN	47962
device	0	3.97	1.33	0	30	1	926	Noun	NN	1004035
devil	0	3.41	1.57	0	29	1	2108	Noun	NN	106501
devotee	0	2.86	1.43	0	29	1	7	Noun	NN	27630
devotion	0	2.36	1.37	0	28	1	211	Noun	NN	66522
dew	0	4.38	0.8	1	27	0.96	109	Noun	NN	13572
dexterity	0	2.72	1.46	0	29	1	21	Noun	NN	10273
diabetes	0	3.83	1.34	0	29	1	166	Noun	NN	167047
diagnosis	0	2.63	1.31	0	27	1	219	Noun	NN	198803
dialect	0	2.67	1.52	0	27	1	68	Noun	NN	39196
dialogue	0	3	1.44	0	29	1	208	Noun	NN	255392
dialysis	0	3.54	1.5	0	26	1	77	Noun	NN	13568
diameter	0	4.03	1.21	0	29	1	53	Noun	NN	122767
diamond	0	4.89	0.42	0	28	1	1053	Noun	NN	104846
diaphragm	0	3.93	1.11	0	27	1	105	Noun	NN	13853
diarrhea	0	4.52	1.01	0	27	1	122	Noun	NN	23401
diary	0	4.5	1.14	0	26	1	458	Noun	NN	112435
dick	0	4.35	0.98	3	29	0.9	2703	Noun	NN	25664
dictator	0	4.29	0.9	0	28	1	108	Noun	NN	51618
dictatorship	0	2.77	1.48	0	30	1	47	Noun	NN	52781
dictionary	0	4.62	0.82	0	29	1	190	Noun	NN	80259
diet	0	3.21	1.54	0	29	1	784	Noun	NN	378653
difference	0	2.15	1.19	0	26	1	4066	Noun	NN	1506553
differentiation	0	2.16	1.25	3	28	0.89	4	Noun	NN	39226
difficulty	0	1.9	1.11	0	29	1	285	Noun	NN	576610
diffusion	0	2.24	1.41	0	29	1	11	Noun	NN	26252
digestion	0	3.66	1.29	0	29	1	52	Noun	NN	23700
digit	0	4.52	0.91	0	29	1	30	Noun	NN	68602
dignitary	0	3.1	1.58	0	30	1	6	Noun	NN	11799
dignity	0	2.03	1.3	0	29	1	551	Noun	NN	120976
dilemma	0	2	1.05	0	28	1	133	Noun	NN	83174
diligence	0	1.97	1.33	0	30	1	39	Noun	NN	34488
dilution	0	2.24	0.88	2	27	0.93	2	Noun	NN	15778
dime	0	4.85	0.37	0	26	1	615	Noun	NN	22602
dimension	0	2.5	1.42	0	26	1	236	Noun	NN	252990
diner	0	4.82	0.77	0	28	1	632	Noun	NN	36901
dining	0	3.75	1.11	1	29	0.97	598	Noun	NN	159316
dinner	0	4.5	0.83	0	24	1	10336	Noun	NN	395744
dinosaur	0	4.87	0.43	0	31	1	203	Noun	NN	67339
diocese	0	3.04	1.2	2	30	0.93	41	Noun	NN	35382
dioxide	0	2.81	1.65	1	27	0.96	52	Noun	NN	80351
diploma	0	4.93	0.27	0	27	1	129	Noun	NN	40481
diplomacy	0	2.04	1.26	0	27	1	81	Noun	NN	42843
diplomat	0	3.67	1.39	0	27	1	109	Noun	NN	46642
direction	0	2.79	1.08	0	29	1	1228	Noun	NN	869701
directive	0	2.72	1.36	0	29	1	90	Noun	NN	97114
director	0	4.04	1.1	0	28	1	1834	Noun	NN	1012288
directory	0	4.25	1.04	0	28	1	84	Noun	NN	232126
dirt	0	4.86	0.36	0	28	1	1310	Noun	NN	106179
disability	0	3.46	1.4	1	29	0.97	101	Noun	NN	383638
disagreement	0	2.97	1.52	0	29	1	78	Noun	NN	73598
disappearance	0	2.4	1.38	0	25	1	220	Noun	NN	46057
disappointment	0	1.93	1.13	0	29	1	277	Noun	NN	102895
disapproval	0	2.32	1.19	0	28	1	31	Noun	NN	17051
disarmament	0	2.54	1.39	2	28	0.93	15	Noun	NN	24093
disaster	0	3.07	1.44	0	29	1	881	Noun	NN	314162
disbelief	0	1.89	1.15	0	27	1	25	Noun	NN	31404
disc	0	4.85	0.36	0	27	1	131	Noun	NN	209671
discernment	0	1.57	0.79	1	29	0.97	2	Noun	NN	13575
disciple	0	3.29	1.44	0	28	1	52	Noun	NN	107698
disclaimer	0	3.37	1.36	0	27	1	4	Noun	NN	37197
disclosure	0	2.18	1.28	0	28	1	51	Noun	NN	149459
disco	0	3.63	1.4	0	30	1	294	Noun	NN	34839
discourse	0	2.87	1.25	0	30	1	20	Noun	NN	137264
discovery	0	2.36	1.42	0	28	1	584	Noun	NN	292330
discrepancy	0	2.54	1.32	1	29	0.97	45	Noun	NN	41618
discretion	0	1.6	0.89	0	30	1	187	Noun	NN	106498
discrimination	0	2.29	1.18	0	28	1	111	Noun	NN	215822
discussion	0	3.07	1.21	0	27	1	619	Noun	NN	1169521
disease	0	3.45	1.33	0	29	1	1335	Noun	NN	958551
dishonesty	0	1.9	1.09	0	30	1	29	Noun	NN	17919
dishwasher	0	4.86	0.59	0	28	1	103	Noun	NN	29657
disinformation	0	1.87	1.29	4	27	0.85	12	Noun	NN	11977
disintegration	0	2.96	1.43	1	29	0.97	12	Noun	NN	13229
disk	0	4.8	0.41	0	25	1	338	Noun	NN	216046
dislocation	0	3.18	1.44	1	29	0.97	15	Noun	NN	12327
dismissal	0	2	1.16	0	29	1	57	Noun	NN	76306
disobedience	0	2.52	1.48	1	30	0.97	39	Noun	NN	22399
disorder	0	3.1	1.37	0	30	1	364	Noun	NN	289519
disparity	0	1.78	0.85	1	28	0.96	10	Noun	NN	44658
dispensation	0	2	1.09	4	27	0.85	18	Noun	NN	14465
dispenser	0	3.84	1.43	1	26	0.96	52	Noun	NN	13300
dispersal	0	2.78	1.28	1	28	0.96	23	Noun	NN	17120
dispersion	0	2.22	1.15	2	29	0.93	3	Noun	NN	15203
displacement	0	2.72	1.39	0	29	1	43	Noun	NN	40847
displeasure	0	1.85	1.1	0	27	1	34	Noun	NN	11716
disposal	0	2.89	1.53	0	27	1	250	Noun	NN	121224
disposition	0	2.1	1.14	0	29	1	110	Noun	NN	63758
disqualification	0	1.89	1.23	0	28	1	18	Noun	NN	10421
disruption	0	2.39	1.2	0	28	1	51	Noun	NN	84544
dissatisfaction	0	1.96	1.37	0	27	1	14	Noun	NN	23230
dissection	0	3.48	1.48	2	27	0.93	44	Noun	NN	12592
dissemination	0	1.92	1.21	4	28	0.86	3	Noun	NN	37751
dissertation	0	2.81	1.44	2	28	0.93	61	Noun	NN	76561
disservice	0	1.77	1.14	0	30	1	18	Noun	NN	12916
dissolution	0	1.82	0.9	1	29	0.97	5	Noun	NN	30166
dissonance	0	1.74	0.86	4	27	0.85	3	Noun	NN	12177
distillery	0	4.41	1.15	0	29	1	14	Noun	NN	10630
distinction	0	2.08	1.41	1	27	0.96	150	Noun	NN	237495
distortion	0	2.3	1.42	0	30	1	60	Noun	NN	66702
distraction	0	2.46	1.35	0	28	1	200	Noun	NN	71026
distribution	0	3.33	1.36	0	27	1	157	Noun	NN	475388
distributor	0	3.9	1.4	0	29	1	78	Noun	NN	80444
district	0	3.29	1.3	1	29	0.97	1068	Noun	NN	545462
disturbance	0	2.7	1.61	0	27	1	201	Noun	NN	71585
diver	0	4.69	0.71	0	29	1	124	Noun	NN	42993
divergence	0	2.15	0.88	2	28	0.93	3	Noun	NN	20541
diversification	0	1.89	1.09	1	28	0.96	7	Noun	NN	19838
diversion	0	2.67	1.42	1	31	0.97	158	Noun	NN	42281
diversity	0	2.28	1.19	0	29	1	56	Noun	NN	258351
dividend	0	2.76	1.38	0	29	1	19	Noun	NN	78599
divider	0	3.9	1.3	0	30	1	8	Noun	NN	11170
divination	0	1.85	1.1	3	30	0.9	5	Noun	NN	11677
divinity	0	1.9	1.18	0	29	1	43	Noun	NN	27836
division	0	2.8	1.35	0	30	1	946	Noun	NN	420287
dizziness	0	3.07	1.38	0	27	1	47	Noun	NN	12060
doc	0	3.68	1.35	3	28	0.89	4122	Noun	NN	55128
doctor	0	4.69	0.81	0	29	1	13461	Noun	NN	769031
doctorate	0	3.4	1.48	0	30	1	46	Noun	NN	34882
doctrine	0	2.12	1.18	0	26	1	43	Noun	NN	223749
documentation	0	3.55	1.35	0	29	1	69	Noun	NN	204149
dog	0	4.85	0.46	0	27	1	9835	Noun	NN	1284808
dogma	0	1.79	1.03	1	29	0.97	13	Noun	NN	37913
doll	0	5	0	0	24	1	1263	Noun	NN	74894
dollar	0	4.93	0.26	0	28	1	1410	Noun	NN	581496
dolphin	0	4.96	0.19	0	28	1	141	Noun	NN	40412
domain	0	3.4	1.22	0	30	1	132	Noun	NN	330398
dominance	0	2.53	1.41	0	30	1	39	Noun	NN	57364
domination	0	2.81	1.36	1	28	0.96	79	Noun	NN	49999
dominion	0	1.96	1.4	1	28	0.96	58	Noun	NN	19660
domino	0	4.59	1.08	0	27	1	205	Noun	NN	12885
donation	0	3.32	1.56	0	28	1	179	Noun	NN	230019
donkey	0	5	0	0	29	1	273	Noun	NN	33427
donor	0	3.54	1.3	0	26	1	208	Noun	NN	148047
donut	0	4.93	0.26	0	29	1	72	Noun	NN	14865
door	0	4.81	0.65	0	31	1	14895	Noun	NN	1306151
doorstep	0	5	0	0	28	1	172	Noun	NN	41644
doorway	0	4.75	0.7	0	28	1	164	Noun	NN	51273
dopamine	0	3.67	1.01	3	27	0.89	77	Noun	NN	13763
dorm	0	4.41	1.25	0	27	1	369	Noun	NN	21475
dormitory	0	4.64	0.91	1	29	0.97	51	Noun	NN	14322
dosage	0	4.07	0.94	1	29	0.97	102	Noun	NN	36037
dossier	0	4.21	1.18	4	28	0.86	56	Noun	NN	12607
dough	0	4.79	0.59	0	24	1	810	Noun	NN	68148
doughnut	0	4.96	0.2	0	26	1	215	Noun	NN	13058
downfall	0	2.31	1.26	1	27	0.96	64	Noun	NN	25892
downpour	0	3.71	1.12	0	28	1	3	Noun	NN	10019
downtime	0	1.93	1	0	27	1	22	Noun	NN	15691
downturn	0	2.08	1.15	3	28	0.89	4	Noun	NN	48575
dozen	0	4.66	0.72	0	29	1	1231	Noun	NN	327061
dragon	0	4.39	1.03	0	28	1	984	Noun	NN	78060
drainage	0	3.96	1.16	0	27	1	46	Noun	NN	63939
drama	0	2.34	1.37	0	29	1	1028	Noun	NN	226070
draught	0	3.46	1.28	3	27	0.89	24	Noun	NN	17190
drawback	0	2.52	1.43	0	29	1	32	Noun	NN	44859
drawer	0	4.67	0.84	0	30	1	663	Noun	NN	58095
dreamer	0	2.19	1.33	0	27	1	155	Noun	NN	17495
dresser	0	4.96	0.19	0	28	1	182	Noun	NN	12697
drinker	0	3.32	1.39	0	28	1	95	Noun	NN	33108
driver	0	4.71	0.66	0	28	1	2416	Noun	NN	852468
driveway	0	4.77	0.68	0	30	1	343	Noun	NN	45667
droplet	0	4.45	0.99	0	29	1	2	Noun	NN	16877
dropout	0	3.52	1.28	0	27	1	43	Noun	NN	14355
drought	0	3.74	1.26	1	28	0.96	70	Noun	NN	82589
drug	0	4.48	0.83	0	29	1	2306	Noun	NN	1056407
drummer	0	4.44	1.09	0	27	1	187	Noun	NN	53141
dryer	0	4.79	0.5	0	28	1	231	Noun	NN	35756
dualism	0	2.19	1.42	0	27	1	1	Noun	NN	11100
duality	0	1.93	1.12	1	29	0.97	14	Noun	NN	16078
duct	0	4.74	0.66	0	27	1	160	Noun	NN	32151
dude	0	3.93	1.36	0	27	1	5071	Noun	NN	64375
duet	0	3.78	1.15	0	27	1	66	Noun	NN	19893
duke	0	4	1.15	0	28	1	1277	Noun	NN	16495
dune	0	4.46	0.95	0	26	1	51	Noun	NN	31293
dung	0	4.64	0.76	4	29	0.86	90	Noun	NN	10794
dungeon	0	4.32	1.18	1	26	0.96	131	Noun	NN	24411
duo	0	3.7	1.49	0	30	1	77	Noun	NN	56929
duplication	0	3.3	1.75	0	27	1	7	Noun	NN	25901
durability	0	2.81	1.42	0	27	1	11	Noun	NN	29172
duration	0	2.08	1.02	0	26	1	81	Noun	NN	147119
duty	0	2.19	1.36	0	27	1	2599	Noun	NN	715001
duvet	0	4.85	0.46	2	29	0.93	12	Noun	NN	12790
dweller	0	3.5	1.46	0	30	1	9	Noun	NN	18379
dwelling	0	4.14	1.46	0	28	1	68	Noun	NN	88118
dynamics	0	1.96	1.3	0	23	1	43	Noun	NN	116886
dynasty	0	2.46	1.45	0	28	1	130	Noun	NN	36702
dysfunction	0	1.88	1.18	0	26	1	61	Noun	NN	35485
dyslexia	0	2.64	1.57	1	29	0.97	13	Noun	NN	15985
eagerness	0	1.69	0.85	0	29	1	13	Noun	NN	12284
eagle	0	5	0	0	28	1	586	Noun	NN	50436
ear	0	5	0	0	27	1	1632	Noun	NN	354460
earl	0	2.85	1.49	4	30	0.87	1042	Noun	NN	12142
earner	0	3.7	1.17	0	27	1	18	Noun	NN	28437
earring	0	4.96	0.19	0	27	1	138	Noun	NN	17646
earth	0	4.8	0.55	0	30	1	5074	Noun	NN	852266
earthquake	0	3.97	1.3	0	30	1	325	Noun	NN	130479
easement	0	2.88	1.61	4	30	0.87	8	Noun	NN	16979
eater	0	3.75	1.17	1	29	0.97	80	Noun	NN	23504
eatery	0	4.48	0.95	0	29	1	10	Noun	NN	14317
eccentricity	0	1.84	1.03	2	27	0.93	10	Noun	NN	10402
ecologist	0	3.68	1.39	1	29	0.97	2	Noun	NN	12194
ecology	0	2.64	1.22	0	25	1	15	Noun	NN	63014
economics	0	1.77	1.18	0	26	1	126	Noun	NN	185353
economist	0	3.25	1.55	0	28	1	11	Noun	NN	151159
economy	0	2.57	1.65	0	30	1	296	Noun	NN	1039246
ecosystem	0	4.11	1.31	0	28	1	32	Noun	NN	118530
ecstasy	0	2.04	1.26	0	28	1	162	Noun	NN	19786
eczema	0	4.23	1.07	0	26	1	9	Noun	NN	13990
edict	0	2.63	1.57	2	29	0.93	16	Noun	NN	13292
edifice	0	3.64	1.36	2	24	0.92	21	Noun	NN	17008
edition	0	3.21	1.47	0	28	1	249	Noun	NN	413709
editor	0	4.25	1	0	28	1	633	Noun	NN	630874
education	0	2.93	1.34	0	30	1	996	Noun	NN	1596143
educator	0	4	1.15	0	28	1	24	Noun	NN	119961
eel	0	4.69	0.89	0	29	1	73	Noun	NN	13997
effect	0	1.8	1.19	0	25	1	1219	Noun	NN	2258343
effectiveness	0	2.07	1.09	0	28	1	27	Noun	NN	179725
efficiency	0	2.15	1.35	0	27	1	139	Noun	NN	326394
effort	0	2.33	1.33	0	27	1	987	Noun	NN	1590763
egg	0	4.97	0.18	0	30	1	1328	Noun	NN	385602
ego	0	1.74	1.1	0	27	1	382	Noun	NN	90005
elaboration	0	2.11	1.31	1	28	0.96	4	Noun	NN	13464
elasticity	0	2.92	1.15	0	25	1	18	Noun	NN	15080
election	0	3.17	1.42	0	30	1	560	Noun	NN	857044
electorate	0	2.67	1.49	1	28	0.96	9	Noun	NN	49440
electrician	0	4.21	1.26	0	29	1	76	Noun	NN	25685
electricity	0	3.9	1.4	0	29	1	584	Noun	NN	275471
electrode	0	3.48	1.5	0	27	1	15	Noun	NN	26802
electrolyte	0	3.37	1.47	0	27	1	11	Noun	NN	11643
electron	0	2.96	1.63	0	27	1	37	Noun	NN	96153
electronics	0	4.37	0.96	0	30	1	139	Noun	NN	95123
elegance	0	2.18	1.19	0	28	1	65	Noun	NN	33227
element	0	3.63	1.35	0	30	1	338	Noun	NN	1058538
elephant	0	5	0	0	27	1	580	Noun	NN	91516
elevation	0	3.79	1.2	0	28	1	47	Noun	NN	83593
elevator	0	4.79	0.68	0	29	1	1245	Noun	NN	56381
elf	0	4.3	1.32	0	30	1	193	Noun	NN	24986
eligibility	0	1.88	1.19	1	25	0.96	13	Noun	NN	67708
elimination	0	2	1.04	1	26	0.96	66	Noun	NN	56093
elm	0	4.69	1.04	0	29	1	73	Noun	NN	10361
eloquence	0	1.88	1.14	0	26	1	27	Noun	NN	12748
emancipation	0	2.37	1.19	0	30	1	24	Noun	NN	18856
embankment	0	4.07	1.46	1	29	0.97	24	Noun	NN	15968
embarrassment	0	2.43	1.22	0	30	1	247	Noun	NN	48332
embassy	0	3.96	1.4	0	28	1	397	Noun	NN	57067
embellishment	0	2.86	1.46	0	29	1	2	Noun	NN	10376
emblem	0	4.3	1.32	1	28	0.96	33	Noun	NN	29411
embodiment	0	2.14	1.38	0	28	1	29	Noun	NN	28332
embroidery	0	4.63	0.84	0	27	1	25	Noun	NN	17899
embryo	0	4.61	0.92	0	28	1	39	Noun	NN	61514
emergence	0	2.56	1.23	2	27	0.93	10	Noun	NN	75599
emergency	0	2.41	1.05	0	27	1	2776	Noun	NN	387894
emigration	0	2.7	1.3	0	27	1	13	Noun	NN	15800
emission	0	3.33	1.27	0	27	1	25	Noun	NN	300932
emitter	0	3.25	1.39	4	28	0.86	7	Noun	NN	10591
emotion	0	2.44	1.48	0	27	1	423	Noun	NN	300709
empathy	0	1.63	1.01	0	27	1	58	Noun	NN	50033
emperor	0	4.35	0.88	0	31	1	690	Noun	NN	61590
emphasis	0	2.12	1.24	0	26	1	65	Noun	NN	291315
empire	0	3	1.57	0	26	1	646	Noun	NN	174103
employee	0	4.1	1.21	0	30	1	590	Noun	NN	980117
employer	0	3.81	1.42	0	27	1	274	Noun	NN	615003
employment	0	3.3	1.56	0	27	1	272	Noun	NN	529671
empowerment	0	2.36	1.39	0	28	1	5	Noun	NN	34269
emptiness	0	2.32	1.31	0	25	1	92	Noun	NN	20683
emulation	0	2.12	1.09	3	28	0.89	1	Noun	NN	13602
enactment	0	2.45	1.33	0	29	1	1	Noun	NN	26065
encampment	0	3.82	1.3	4	26	0.85	16	Noun	NN	10729
enclosure	0	4.04	1.26	0	28	1	20	Noun	NN	64999
encoder	0	3.81	1.39	2	29	0.93	11	Noun	NN	10666
encore	0	2.81	1.3	1	28	0.96	126	Noun	NN	15477
encouragement	0	1.96	1.4	0	27	1	112	Noun	NN	85762
encroachment	0	2.32	1.35	3	28	0.89	2	Noun	NN	11742
encryption	0	3.29	1.44	1	29	0.97	83	Noun	NN	48543
encyclopedia	0	4.79	0.5	0	28	1	81	Noun	NN	23849
ending	0	2.31	1.42	0	29	1	812	Noun	NN	105844
endorsement	0	2.53	1.22	0	30	1	71	Noun	NN	65173
endowment	0	2.89	1.34	0	27	1	28	Noun	NN	30874
endpoint	0	3.26	1.46	0	27	1	1	Noun	NN	11505
endurance	0	2	1.2	0	26	1	68	Noun	NN	43796
enemy	0	2.83	1.36	0	29	1	2474	Noun	NN	538854
energy	0	3.11	1.48	0	27	1	1678	Noun	NN	1604938
enforcement	0	2.48	1.39	2	27	0.93	339	Noun	NN	274640
enforcer	0	3.23	1.43	0	30	1	34	Noun	NN	10210
engagement	0	2.75	1.46	0	28	1	666	Noun	NN	242305
engine	0	4.86	0.58	0	29	1	1626	Noun	NN	890733
engineering	0	2.69	1.42	0	29	1	333	Noun	NN	376958
engraving	0	4.28	1.13	1	30	0.97	23	Noun	NN	18766
enhancement	0	2.29	1.3	0	31	1	23	Noun	NN	85495
enigma	0	1.79	1.2	2	30	0.93	47	Noun	NN	12161
enjoyment	0	2.17	1.44	0	29	1	69	Noun	NN	92360
enlargement	0	3.38	1.44	0	24	1	21	Noun	NN	20791
enlightenment	0	1.5	0.94	0	30	1	74	Noun	NN	58439
enquiry	0	2.77	1.34	3	29	0.9	9	Noun	NN	114356
enrichment	0	1.83	0.95	0	30	1	7	Noun	NN	38207
enrollment	0	2.96	1.31	0	25	1	23	Noun	NN	59526
ensemble	0	3.7	1.35	0	27	1	57	Noun	NN	63733
entanglement	0	2.76	1.27	0	29	1	8	Noun	NN	11780
enterprise	0	2.04	1	1	27	0.96	413	Noun	NN	306978
entertainer	0	4.17	1.1	0	29	1	84	Noun	NN	25418
entertainment	0	2.92	1.23	0	26	1	640	Noun	NN	290930
enthusiasm	0	2.34	1.34	0	29	1	229	Noun	NN	155471
enthusiast	0	2.23	1.18	0	26	1	29	Noun	NN	91621
entirety	0	3.07	1.44	1	30	0.97	24	Noun	NN	43313
entitlement	0	1.79	0.98	1	25	0.96	12	Noun	NN	76740
entity	0	2.68	1.59	0	28	1	86	Noun	NN	279823
entourage	0	3.46	1.29	0	28	1	69	Noun	NN	10756
entrance	0	4.23	0.99	0	31	1	800	Noun	NN	290490
entrepreneur	0	3.07	1.33	0	28	1	55	Noun	NN	126560
entry	0	3.62	1.52	0	29	1	620	Noun	NN	715798
envelope	0	4.93	0.26	0	28	1	513	Noun	NN	86370
environment	0	3.74	1.46	0	27	1	652	Noun	NN	1270871
environmentalist	0	3.72	1.39	0	29	1	13	Noun	NN	31850
envoy	0	3.5	1.43	0	30	1	44	Noun	NN	16256
enzyme	0	3.57	1.41	0	30	1	54	Noun	NN	74381
epidemiology	0	2.7	1.46	1	28	0.96	7	Noun	NN	15919
epilepsy	0	3.29	1.41	1	29	0.97	53	Noun	NN	29662
epiphany	0	1.6	0.71	0	25	1	66	Noun	NN	11233
episode	0	3.22	1.4	0	27	1	627	Noun	NN	456506
epitome	0	1.8	1.22	3	28	0.89	22	Noun	NN	12785
equality	0	1.41	0.69	0	27	1	97	Noun	NN	196918
equation	0	3.65	1.5	1	27	0.96	178	Noun	NN	160815
equator	0	3.85	1.51	0	27	1	31	Noun	NN	18181
equilibrium	0	2.62	1.33	1	27	0.96	46	Noun	NN	54281
equipment	0	4.83	0.38	0	30	1	1298	Noun	NN	726190
equity	0	2.22	1.31	0	27	1	67	Noun	NN	178056
era	0	2.24	1.43	0	29	1	291	Noun	NN	326387
eradication	0	2.3	1.29	0	30	1	15	Noun	NN	16441
erection	0	4.22	1.12	0	27	1	111	Noun	NN	32988
erosion	0	3.83	1.21	0	30	1	28	Noun	NN	60017
errand	0	3.37	1.52	1	28	0.96	204	Noun	NN	16469
error	0	2.68	1.52	0	28	1	473	Noun	NN	675806
eruption	0	3.56	1.15	0	27	1	20	Noun	NN	42160
escalation	0	2.27	1.22	1	27	0.96	20	Noun	NN	19622
escalator	0	5	0	0	29	1	66	Noun	NN	11880
espionage	0	2.53	1.04	1	31	0.97	87	Noun	NN	21403
espresso	0	4.41	1.24	0	29	1	105	Noun	NN	22348
essay	0	3.97	1.07	0	30	1	313	Noun	NN	311604
essence	0	1.66	1.08	0	29	1	287	Noun	NN	171042
establishment	0	3.48	1.34	0	27	1	210	Noun	NN	282681
estate	0	4.11	1.23	0	28	1	1076	Noun	NN	453124
estimation	0	1.97	1.18	0	29	1	25	Noun	NN	41552
estrogen	0	3.68	1.49	0	25	1	26	Noun	NN	23722
estuary	0	4.17	1.19	4	27	0.85	5	Noun	NN	27328
eternity	0	1.46	0.96	0	28	1	407	Noun	NN	52678
ethanol	0	4.61	0.92	1	29	0.97	15	Noun	NN	40591
ether	0	3.88	1.48	2	27	0.93	108	Noun	NN	17535
ethic	0	1.59	0.93	1	28	0.96	53	Noun	NN	172380
ethnicity	0	2.6	1.3	0	30	1	11	Noun	NN	46559
ethos	0	1.58	0.72	3	27	0.89	7	Noun	NN	47860
etiquette	0	2.15	1.43	0	27	1	96	Noun	NN	18686
euphemism	0	1.74	0.86	0	27	1	46	Noun	NN	11337
euphoria	0	1.47	0.86	0	30	1	25	Noun	NN	10410
euthanasia	0	3.08	1.38	2	27	0.93	23	Noun	NN	18276
evacuation	0	3.44	1.5	0	27	1	169	Noun	NN	38882
evaluation	0	3	1.35	1	24	0.96	225	Noun	NN	301959
evaluator	0	2.96	1.64	1	29	0.97	1	Noun	NN	10305
evangelism	0	1.93	0.92	1	30	0.97	4	Noun	NN	14748
evangelist	0	3.44	1.4	1	28	0.96	6	Noun	NN	22528
evaporation	0	3.03	1.45	0	30	1	2	Noun	NN	14751
evasion	0	2.46	1.17	0	28	1	59	Noun	NN	20701
evening	0	3.26	1.58	0	27	1	6155	Noun	NN	763002
event	0	2.69	1.07	0	29	1	1345	Noun	NN	2817449
eviction	0	3.13	1.38	0	30	1	43	Noun	NN	27412
evidence	0	3.65	1.29	0	26	1	4335	Noun	NN	1825127
evolution	0	2.61	1.4	0	28	1	272	Noun	NN	308451
exaggeration	0	2.29	1.27	1	29	0.97	47	Noun	NN	25650
exam	0	4.48	0.95	0	29	1	684	Noun	NN	215756
examination	0	3.93	1.33	0	29	1	281	Noun	NN	293252
examiner	0	3.57	1.17	0	28	1	130	Noun	NN	39502
example	0	3.03	1.45	0	29	1	1527	Noun	NN	3290323
excavation	0	3.23	1.56	0	26	1	32	Noun	NN	62415
excellence	0	2.2	1.19	0	30	1	134	Noun	NN	119604
exception	0	1.85	1.06	0	27	1	409	Noun	NN	404442
excitement	0	2.48	1.4	0	27	1	628	Noun	NN	140079
exclamation	0	2.48	1.43	0	29	1	28	Noun	NN	13576
exclusion	0	2.07	1.21	0	27	1	12	Noun	NN	95071
exclusivity	0	1.65	0.8	3	29	0.9	11	Noun	NN	12234
excursion	0	2.93	1.39	0	28	1	34	Noun	NN	49231
execution	0	3.93	1.27	1	29	0.97	497	Noun	NN	169588
executor	0	3.23	1.59	0	30	1	32	Noun	NN	17279
exemption	0	2.17	1.31	0	29	1	20	Noun	NN	100291
exertion	0	2.44	1.15	1	28	0.96	15	Noun	NN	18594
exhaustion	0	3.04	1.53	0	27	1	82	Noun	NN	29267
exhibition	0	3.52	1.27	0	29	1	207	Noun	NN	335194
exhibitionist	0	3.67	1.07	0	27	1	10	Noun	NN	17795
exhibitor	0	3.36	1.28	1	29	0.97	2	Noun	NN	24939
exhortation	0	2.04	1.43	3	27	0.89	2	Noun	NN	12275
existence	0	1.54	0.96	1	29	0.97	596	Noun	NN	459035
exodus	0	2.59	1.15	0	29	1	40	Noun	NN	19011
expanse	0	2.68	1.33	1	29	0.97	11	Noun	NN	20423
expansion	0	3	1.29	0	25	1	88	Noun	NN	276728
expectancy	0	1.85	1.35	0	26	1	32	Noun	NN	35598
expectation	0	1.62	1.06	0	26	1	67	Noun	NN	380638
expedition	0	2.96	1.43	0	25	1	289	Noun	NN	100055
expenditure	0	2.76	1.43	0	29	1	14	Noun	NN	161720
expense	0	2.57	1.43	0	30	1	380	Noun	NN	422135
experimentation	0	2.31	1.12	1	27	0.96	30	Noun	NN	44925
experimenter	0	3.8	1.35	0	30	1	2	Noun	NN	10458
expertise	0	1.64	0.83	0	28	1	203	Noun	NN	311728
expiration	0	2.61	1.23	1	24	0.96	52	Noun	NN	26649
explanation	0	1.87	1.02	0	31	1	1023	Noun	NN	419415
exploitation	0	1.7	0.88	0	30	1	51	Noun	NN	88024
exploration	0	2.83	1.34	0	30	1	96	Noun	NN	162343
explorer	0	4.04	1.09	1	28	0.96	97	Noun	NN	47688
explosion	0	4.52	0.69	0	29	1	841	Noun	NN	152063
expo	0	3.21	1.55	2	30	0.93	20	Noun	NN	11868
exponent	0	3.07	1.52	0	27	1	4	Noun	NN	15154
exporter	0	3.5	1.26	0	28	1	4	Noun	NN	25887
exposition	0	2.46	1.17	2	30	0.93	40	Noun	NN	33609
exposure	0	2.39	1.4	0	28	1	291	Noun	NN	363579
expression	0	2.54	1.37	0	28	1	651	Noun	NN	539225
expulsion	0	2.86	1.27	0	29	1	41	Noun	NN	24744
extension	0	2.93	1.25	0	28	1	275	Noun	NN	371325
extent	0	1.44	0.64	0	27	1	207	Noun	NN	502560
extermination	0	2.37	1.28	0	27	1	52	Noun	NN	13952
extinction	0	2.43	1.37	0	28	1	76	Noun	NN	57634
extinguisher	0	4.7	0.65	0	30	1	78	Noun	NN	12691
extortion	0	2.69	1.54	0	29	1	131	Noun	NN	12418
extraction	0	3.14	1.33	0	28	1	126	Noun	NN	58736
extractor	0	3.69	1.34	1	30	0.97	5	Noun	NN	14293
extradition	0	2.29	1.21	1	29	0.97	66	Noun	NN	19894
extravaganza	0	2.58	1.33	0	26	1	36	Noun	NN	11055
extremism	0	1.67	1.14	0	27	1	3	Noun	NN	24884
extremity	0	3.07	1.62	0	27	1	20	Noun	NN	21334
eye	0	4.9	0.41	0	29	1	5701	Noun	NN	1670707
eyebrow	0	4.85	0.77	0	27	1	71	Noun	NN	43289
eyelid	0	5	0	0	27	1	17	Noun	NN	19651
eyesight	0	3.59	1.6	0	27	1	99	Noun	NN	16372
eyewitness	0	3.61	1.52	0	31	1	202	Noun	NN	22987
fable	0	3.07	1.53	0	30	1	20	Noun	NN	18300
fabric	0	4.63	1.08	0	27	1	245	Noun	NN	177772
fabrication	0	2.86	1.53	0	28	1	43	Noun	NN	31739
facade	0	3.19	1.39	1	28	0.96	42	Noun	NN	30755
facelift	0	3.73	1.36	1	31	0.97	7	Noun	NN	12442
facilitation	0	1.81	0.88	0	27	1	6	Noun	NN	12379
facilitator	0	2.96	1.65	1	26	0.96	16	Noun	NN	30095
facility	0	3.58	1.53	0	26	1	723	Noun	NN	1011218
fact	0	2.72	1.56	0	29	1	8801	Noun	NN	3540912
faction	0	2.85	1.26	1	28	0.96	58	Noun	NN	66595
factor	0	2.79	1.45	1	29	0.97	370	Noun	NN	982968
factory	0	4.76	0.79	0	29	1	857	Noun	NN	299140
faculty	0	3.96	1.26	0	28	1	248	Noun	NN	351557
fad	0	2.36	1.19	0	28	1	39	Noun	NN	21414
failure	0	2.08	1.06	0	26	1	1021	Noun	NN	693430
fairness	0	1.83	1.14	0	29	1	104	Noun	NN	77874
fairway	0	4.21	1.17	1	29	0.97	24	Noun	NN	14953
fairytale	0	2.93	1.41	0	29	1	0	Noun	NN	11890
faith	0	1.63	1.08	0	27	1	2363	Noun	NN	721529
faithfulness	0	1.72	0.84	0	25	1	10	Noun	NN	14377
falcon	0	4.9	0.31	0	30	1	169	Noun	NN	13291
fallacy	0	1.8	1.15	2	27	0.93	20	Noun	NN	35083
fallout	0	2.62	1.47	1	25	0.96	111	Noun	NN	23857
falsehood	0	2	1.11	0	27	1	10	Noun	NN	24394
familiarity	0	2.14	1.21	0	28	1	34	Noun	NN	39811
family	0	4.23	0.86	0	30	1	18067	Noun	NN	3785450
famine	0	3.55	1.4	0	29	1	81	Noun	NN	38328
fan	0	4.71	0.53	0	28	1	1792	Noun	NN	1037508
fanfare	0	3.36	1.19	0	25	1	57	Noun	NN	12436
fantasy	0	1.59	0.95	0	29	1	828	Noun	NN	189877
farce	0	2.32	1.19	1	29	0.97	89	Noun	NN	23732
farewell	0	2.21	1.32	0	28	1	482	Noun	NN	35951
farmer	0	4.54	0.95	0	26	1	604	Noun	NN	403527
farmhouse	0	4.74	0.53	0	27	1	67	Noun	NN	27905
farming	0	3.46	1.45	0	26	1	82	Noun	NN	112776
farmland	0	4.86	0.52	0	29	1	20	Noun	NN	30633
fascination	0	1.89	1.03	0	28	1	90	Noun	NN	39047
fascism	0	1.83	1.23	0	29	1	39	Noun	NN	36486
fatality	0	3.5	1.41	0	30	1	46	Noun	NN	32313
fate	0	1.53	0.97	0	30	1	1375	Noun	NN	163278
father	0	4.52	1.02	0	29	1	28279	Noun	NN	1097050
fauna	0	3.96	1.37	3	27	0.89	27	Noun	NN	25380
faux	0	2.5	1.33	3	29	0.9	41	Noun	NN	17830
feasibility	0	1.81	1.11	0	27	1	5	Noun	NN	37044
feat	0	2.44	1.34	1	28	0.96	78	Noun	NN	57692
federation	0	2.24	1.15	0	29	1	197	Noun	NN	28974
fee	0	3.89	1.19	0	27	1	494	Noun	NN	745626
feedback	0	2.48	1.4	0	29	1	140	Noun	NN	378395
feeder	0	4.36	1.06	1	29	0.97	35	Noun	NN	46364
fellowship	0	2.28	1.31	0	29	1	150	Noun	NN	93349
felon	0	3.83	1.37	0	24	1	128	Noun	NN	11819
felony	0	3.5	1.32	0	28	1	285	Noun	NN	36693
femininity	0	2.17	1.42	1	30	0.97	20	Noun	NN	11424
feminism	0	2.17	1.2	0	29	1	17	Noun	NN	49907
fencing	0	4.45	0.78	0	29	1	70	Noun	NN	33049
fermentation	0	3.19	1.3	0	27	1	7	Noun	NN	17603
fern	0	5	0	1	26	0.96	163	Noun	NN	16761
fertility	0	2.59	1.31	0	27	1	97	Noun	NN	65898
fertilization	0	3.21	1.52	0	28	1	12	Noun	NN	12807
fertilizer	0	4.76	0.69	0	29	1	100	Noun	NN	48610
festival	0	4.33	1.04	0	27	1	505	Noun	NN	298468
festivity	0	2.73	1.43	0	26	1	8	Noun	NN	24531
fetish	0	2.48	1.15	0	29	1	117	Noun	NN	14552
fetus	0	4.62	0.92	0	24	1	82	Noun	NN	29961
fever	0	3.27	1.4	0	26	1	1017	Noun	NN	85183
fiasco	0	2.28	1.31	0	29	1	83	Noun	NN	21330
fiber	0	4.5	1.04	0	28	1	156	Noun	NN	92855
fiction	0	2.14	1.48	0	28	1	310	Noun	NN	279646
fidelity	0	1.87	1.17	1	31	0.97	101	Noun	NN	24941
field	0	4.26	1.02	0	27	1	3580	Noun	NN	1774149
fieldwork	0	3.61	1.42	0	28	1	11	Noun	NN	25050
fig	0	4.97	0.19	1	30	0.97	62	Noun	NN	29594
fighter	0	3.96	1.22	0	27	1	652	Noun	NN	160566
filament	0	4.27	1.31	2	28	0.93	17	Noun	NN	17860
filler	0	2.92	1.32	1	25	0.96	28	Noun	NN	34672
filth	0	4.14	1.08	0	28	1	231	Noun	NN	15393
filtration	0	3.5	1.33	1	27	0.96	23	Noun	NN	20151
finale	0	2.76	1.55	0	29	1	125	Noun	NN	45289
finalist	0	3.79	1.42	0	28	1	24	Noun	NN	43627
financier	0	3.46	1.5	2	26	0.92	17	Noun	NN	15613
finder	0	3	1.47	0	28	1	85	Noun	NN	17090
finger	0	5	0	0	29	1	1870	Noun	NN	383319
fingernail	0	4.93	0.26	0	29	1	68	Noun	NN	12310
fingertip	0	4.93	0.38	2	29	0.93	10	Noun	NN	24167
finisher	0	2.82	1.31	0	28	1	8	Noun	NN	13137
fir	0	4.58	1.1	1	27	0.96	22	Noun	NN	15867
firearm	0	4.64	0.76	0	25	1	76	Noun	NN	85250
fireball	0	4.32	0.86	0	28	1	76	Noun	NN	12062
firefighter	0	4.87	0.56	0	31	1	52	Noun	NN	44058
fireman	0	4.8	0.55	0	30	1	149	Noun	NN	20237
fireplace	0	4.68	0.9	0	25	1	259	Noun	NN	58981
firepower	0	3.67	1.3	2	29	0.93	98	Noun	NN	10661
firewall	0	3.82	1.19	0	28	1	55	Noun	NN	43252
firewood	0	4.93	0.37	0	30	1	77	Noun	NN	11938
firework	0	4.62	0.98	0	29	1	8	Noun	NN	52010
[truncated: 3,449 more rows]
