# Supplementary material for: Bridging Behavioral Gaps: Automatic Extrapolation of Concreteness Norms for Arabic and English with a k-Nearest Neighbor Approach
Source: Research Square preprint supplement (doi:10.21203/rs.3.rs-7858980/v1), 2025-11-02

# English Dataset: Rating Agreement and Distribution

## English: Mean concreteness vs. SD (Scatter)

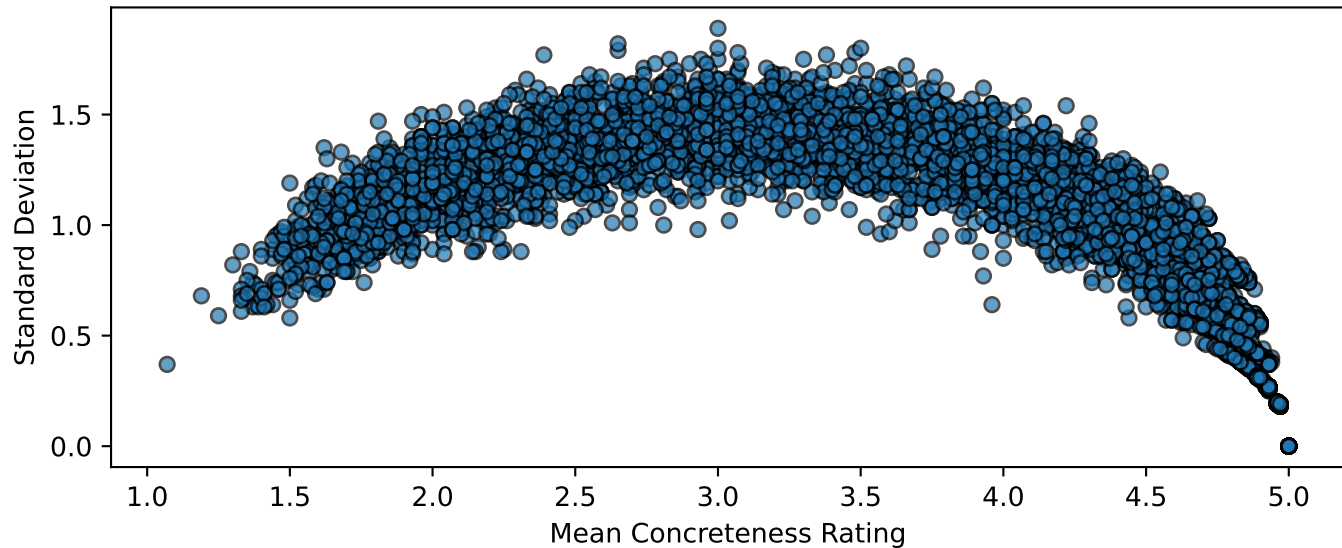

## Distribution (Violin)

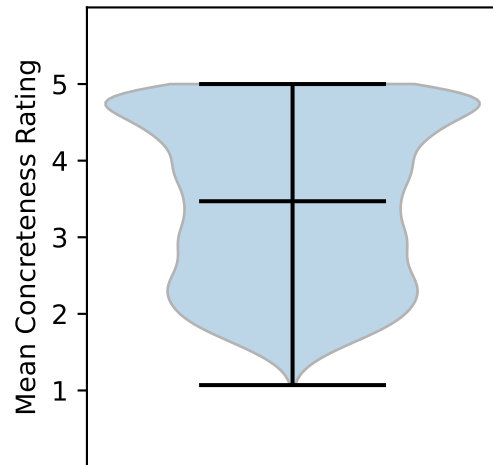

Supplement: Supplementary file 8 [file english_agreement_and_distribution.pdf › concreteness-prediction-main/Analysis/figures/english_agreement_and_distribution.pdf]
