# Supplementary figures and images for: Bridging Behavioral Gaps: Automatic Extrapolation of Concreteness Norms for Arabic and English with a k-Nearest Neighbor Approach
Source: Research Square preprint supplement (doi:10.21203/rs.3.rs-7858980/v1), 2025-11-02

Model vs. Human Concreteness Ratings

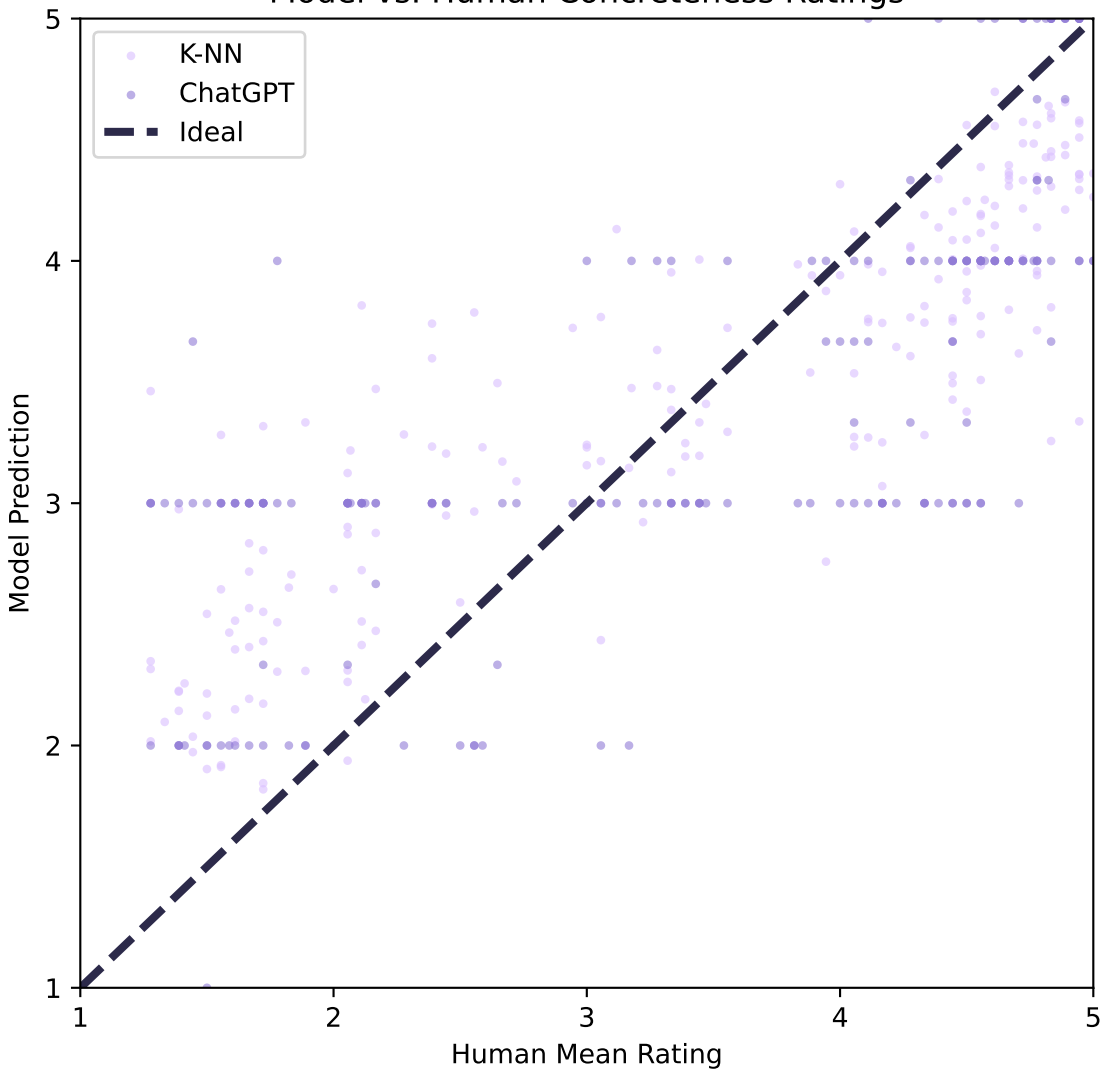

Supplement: Supplementary file 1 [file ar_model_vs_human.pdf › concreteness-prediction-main/Analysis/figures/ar_model_vs_human.pdf]

Bin-size tuning - Arabic

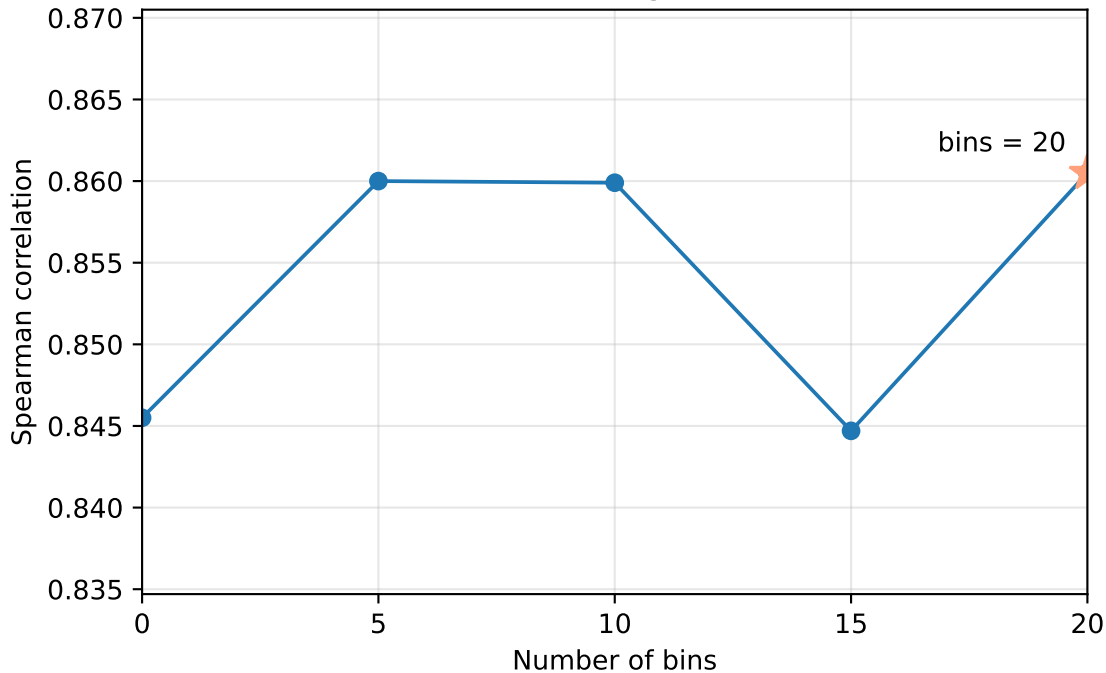

Supplement: Supplementary file 3 [file arabic_bins_tuning.pdf › concreteness-prediction-main/Analysis/figures/arabic_bins_tuning.pdf]

k-value tuning - Arabic

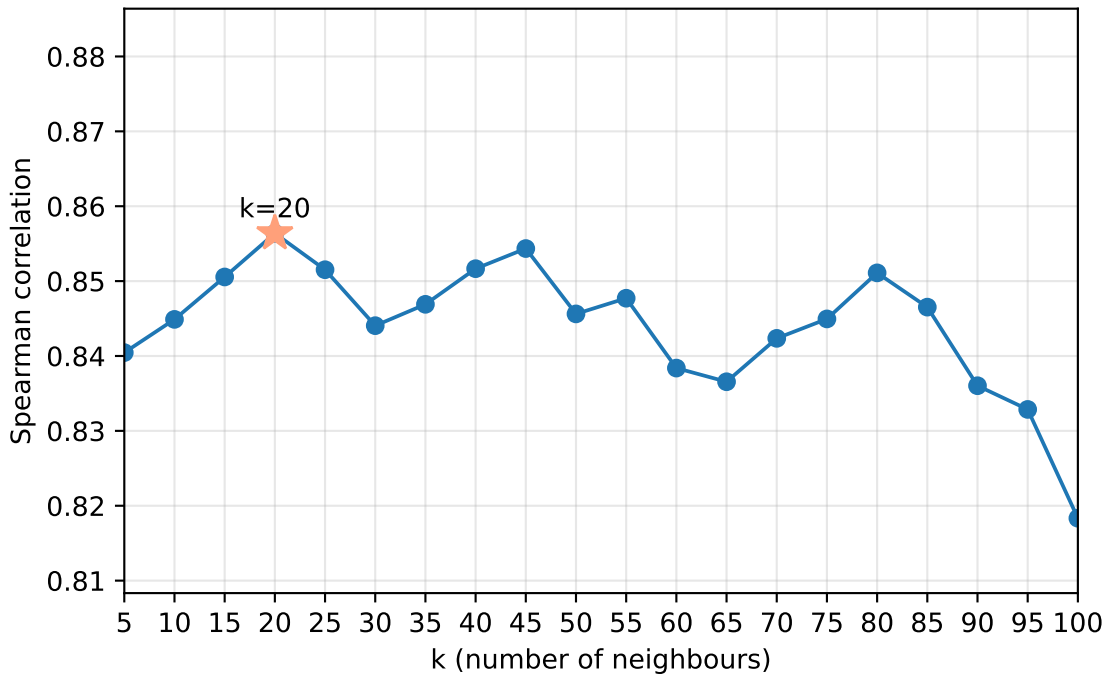

Supplement: Supplementary file 4 [file arabic_k_tuning.pdf › concreteness-prediction-main/Analysis/figures/arabic_k_tuning.pdf]

Arabic: Distribution of Human, KNN & GPT Ratings

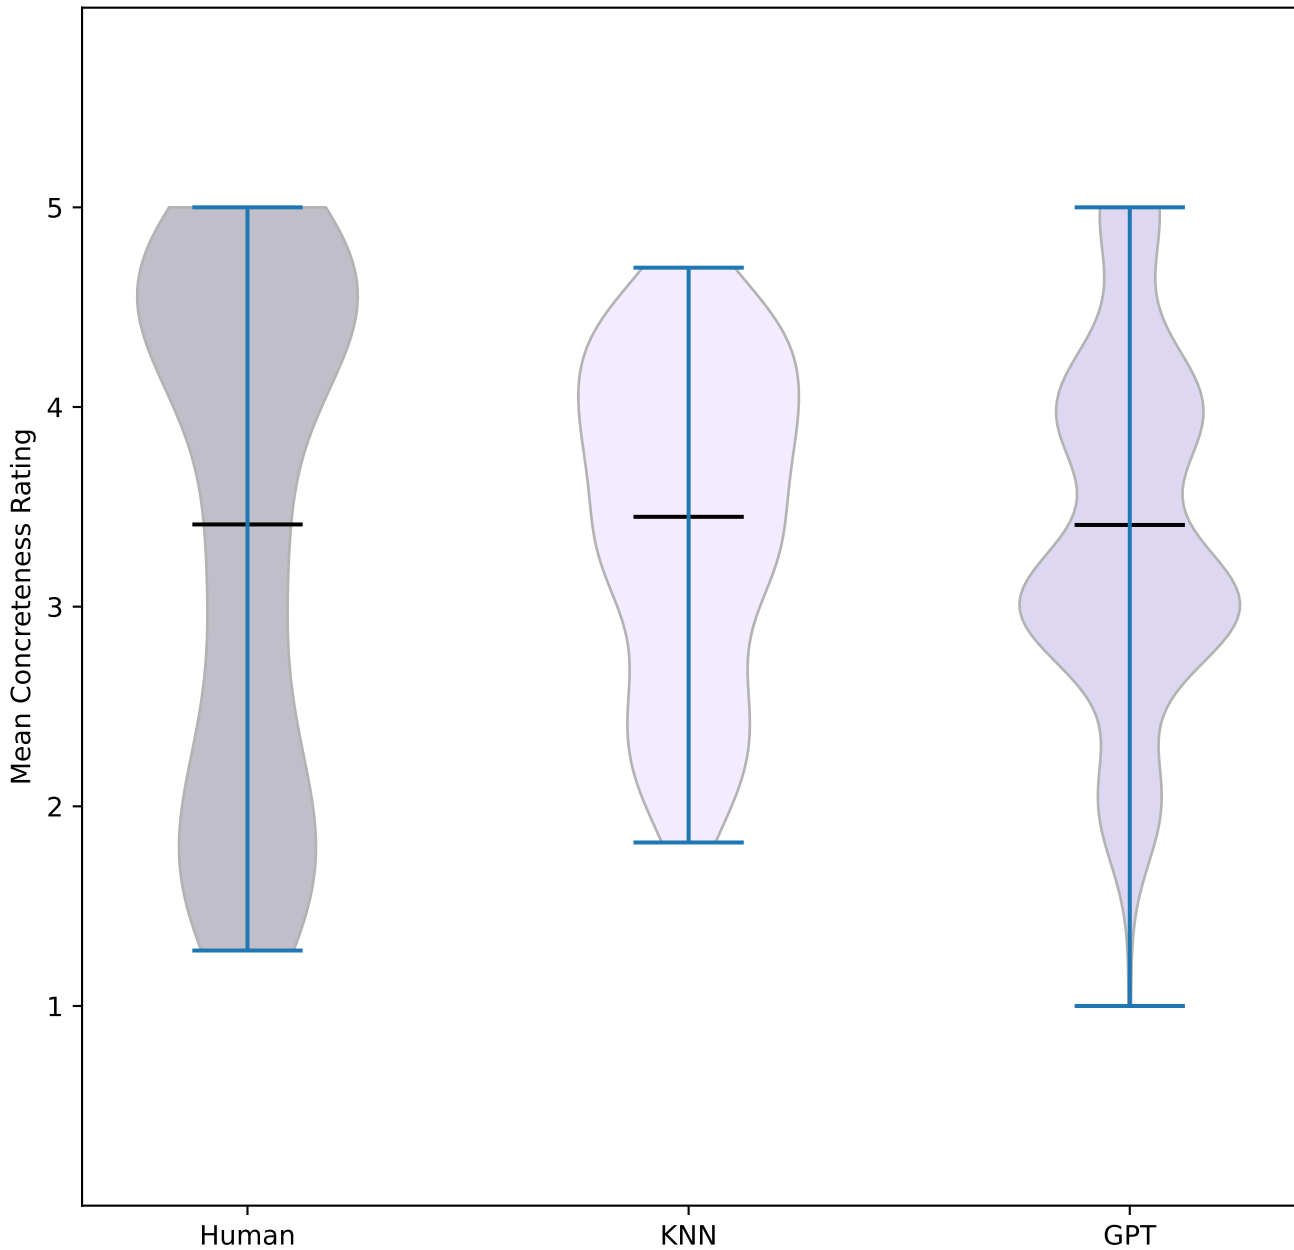

Supplement: Supplementary file 5 [file arabic_models_violin.pdf › concreteness-prediction-main/Analysis/figures/arabic_models_violin.pdf]

Model vs. Human Concreteness Ratings

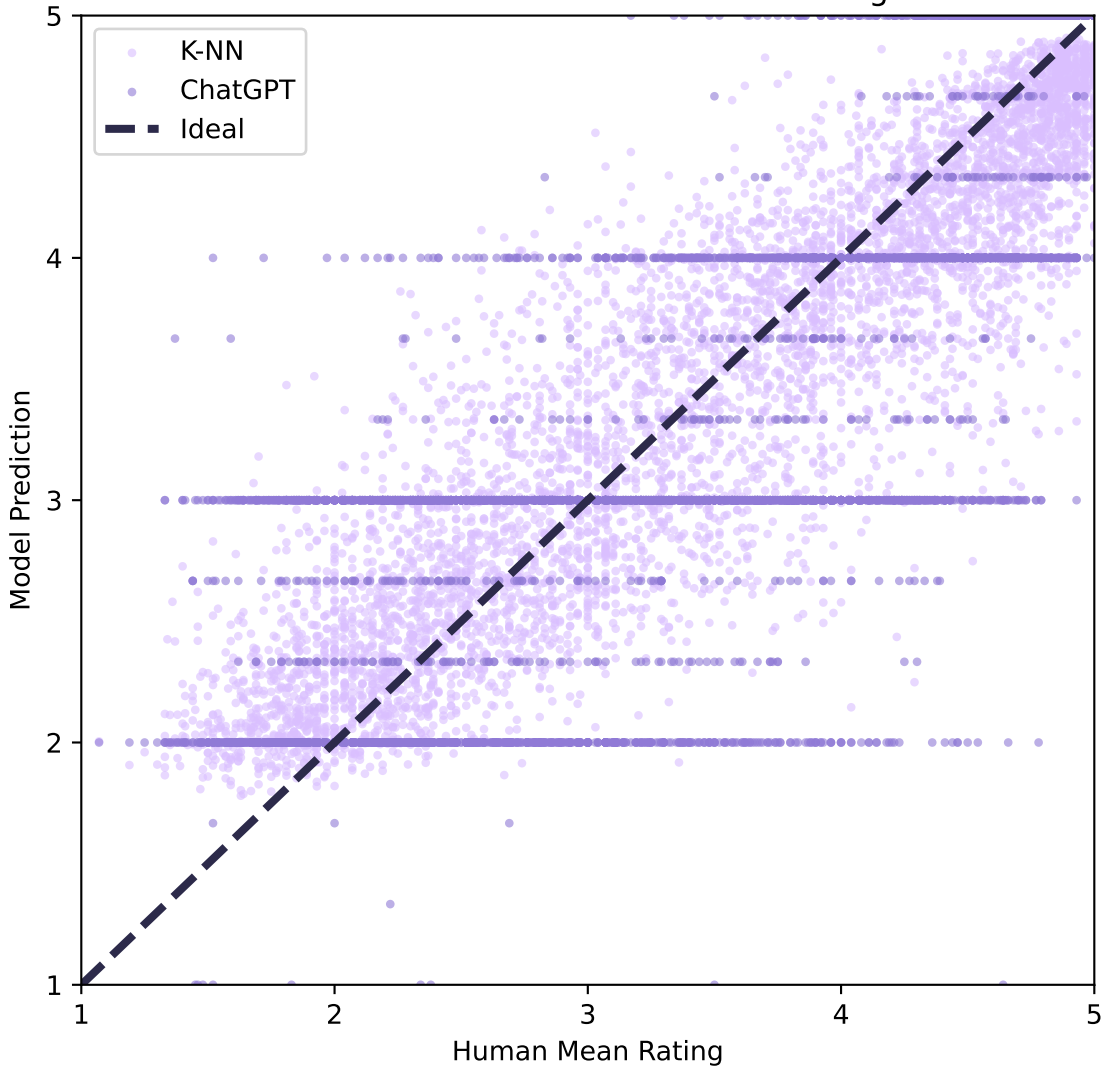

Supplement: Supplementary file 6 [file en_model_vs_human.pdf › concreteness-prediction-main/Analysis/figures/en_model_vs_human.pdf]

Bin-size tuning - English

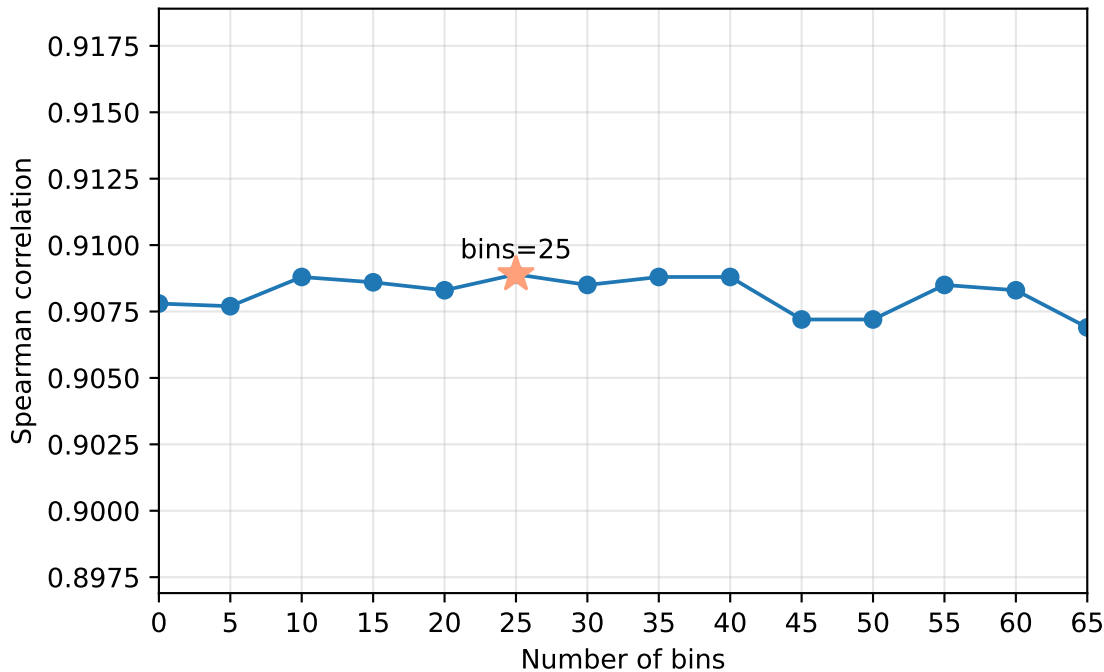

Supplement: Supplementary file 9 [file english_bins_tuning.pdf › concreteness-prediction-main/Analysis/figures/english_bins_tuning.pdf]

k-value tuning - English

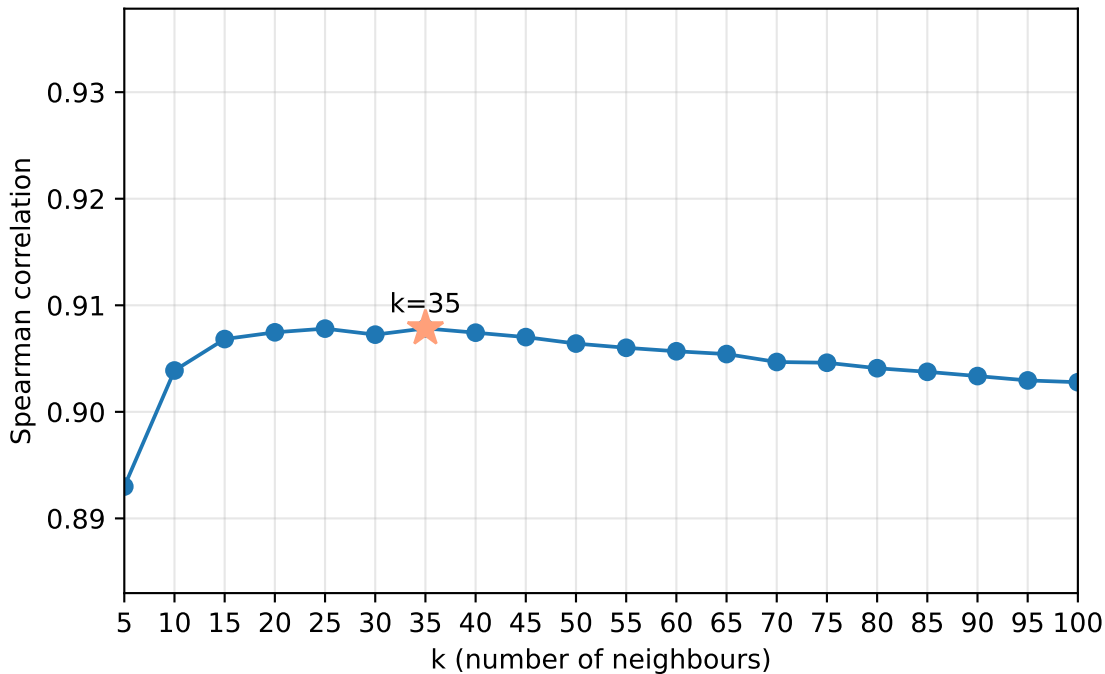

Supplement: Supplementary file 10 [file english_k_tuning.pdf › concreteness-prediction-main/Analysis/figures/english_k_tuning.pdf]

English: Distribution of Human, KNN & GPT Ratings

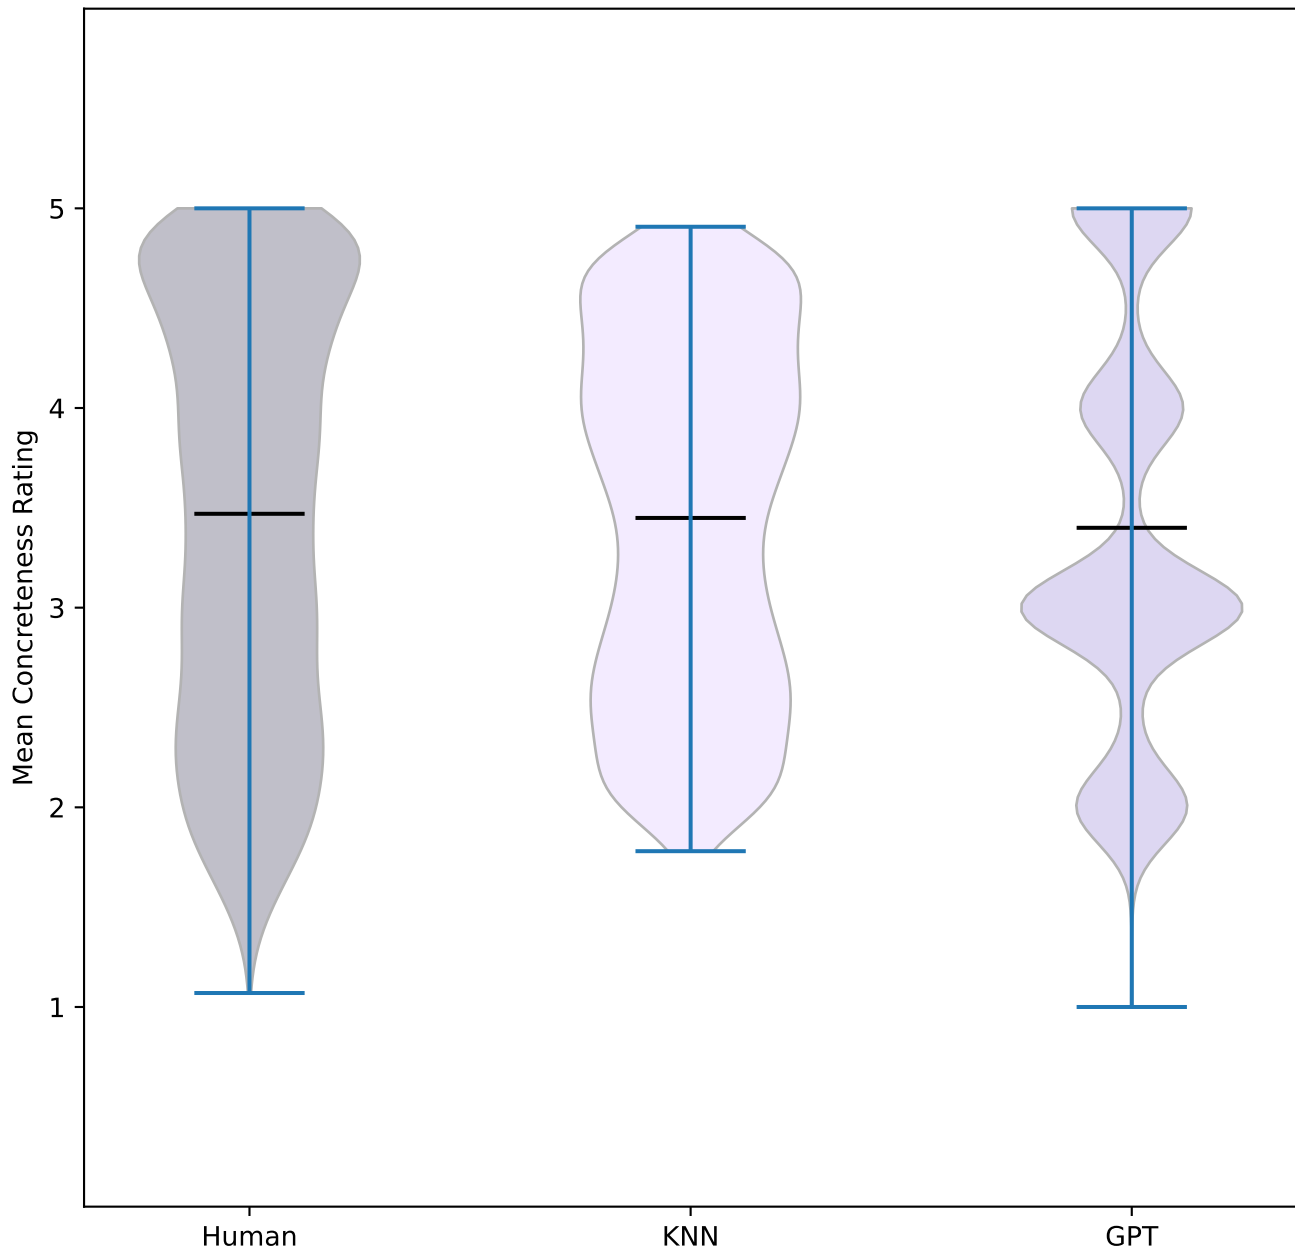

Supplement: Supplementary file 11 [file english_models_violin.pdf › concreteness-prediction-main/Analysis/figures/english_models_violin.pdf]
